# Supplementary material for: Hospital-based surveillance of rotavirus gastroenteritis among children under 5 years of age in the Republic of Ivory Coast: a cross-sectional study
Source: PubMed Central journal article supplement — BMJ Open. 2014 Jan 30;4(1):e003269. doi: 10.1136/bmjopen-2013-003269 (PMC3913025; doi:10.1136/bmjopen-2013-003269), 2014-01-30
Supplement: bmjopen-2013-003269.draft_revisions.pdf [file bmjopen-2013-003269.draft_revisions.pdf]

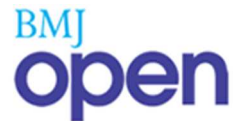

**“Hospital-based surveillance of rotavirus gastroenteritis among children under five years of age in the Republic of Côte d’Ivoire”**

|                                 |                                                                                                                                                                                                                                                                                                                                                                         |
|---------------------------------|-------------------------------------------------------------------------------------------------------------------------------------------------------------------------------------------------------------------------------------------------------------------------------------------------------------------------------------------------------------------------|
| Journal:                        | <i>BMJ Open</i>                                                                                                                                                                                                                                                                                                                                                         |
| Manuscript ID:                  | bmjopen-2013-003269                                                                                                                                                                                                                                                                                                                                                     |
| Article Type:                   | Research                                                                                                                                                                                                                                                                                                                                                                |
| Date Submitted by the Author:   | 06-Jun-2013                                                                                                                                                                                                                                                                                                                                                             |
| Complete List of Authors:       | AKOUA KOFFI, Chantal; Pasteur Institute of Cote d'Ivoire, Department of Epidemic Viruses; Bouake Medical School, Department of Biology ASSE, Vincent; Northern Abobo Hospital, Medical Pediatrics Department Jean Jacques, Yao Atteby; Pediatrics Department of the University Teaching Hospital of Treichville/ Medical Sciences Training and Research Unit of Abidjan |
| <b>Primary Subject Heading</b>: | Epidemiology                                                                                                                                                                                                                                                                                                                                                            |
| Secondary Subject Heading:      | Gastroenterology and hepatology                                                                                                                                                                                                                                                                                                                                         |
| Keywords:                       | VIROLOGY, Gastrointestinal infections < GASTROENTEROLOGY, INFECTIOUS DISEASES                                                                                                                                                                                                                                                                                           |
|                                 |                                                                                                                                                                                                                                                                                                                                                                         |

SCHOLARONE™  
Manuscripts

EPI-RV-Ivory Coast  
Journal resubmission BMJ Open  
31-May-13

## Original Research

**Title:** Hospital-based surveillance of rotavirus gastroenteritis among children under five years of age in the Republic of Côte d'Ivoire

**Authorship:** Akoua-Koffi Chantal,<sup>1</sup> Asse Kouadio Vincent,<sup>2</sup> Yao Atteby Jean Jacques<sup>3</sup>

### Affiliations:

<sup>1</sup>Pasteur Institute of Côte d'Ivoire/ Medical sciences Training and Research Unit of Bouake, Côte d'Ivoire

<sup>2</sup>Northern Abobo Hospital Medical Pediatrics Department, Côte d'Ivoire

<sup>3</sup>Pediatrics Department of the University Teaching Hospital of Treichville/ Medical Sciences Training and Research Unit of Abidjan, Côte d'Ivoire

**Correspondence to:** Akoua-Koffi Chantal

**Address:** Pasteur Institute of Côte d'Ivoire/Medical sciences Training and Research Unit of Bouake (Bouake Medical School)

P box: 490 Abidjan 01, Republic of Côte d'Ivoire

**Tel:** +225 07 98 47 57/ +225 02 03 63 47

**Email:** [akouamc@yahoo.fr](mailto:akouamc@yahoo.fr)

**Keywords:** Côte d'Ivoire, disease burden, rotavirus, gastroenteritis

**Word count: Abstract:** 272/300; **Manuscript:** 3065/4000

1 EPI-RV-Ivory Coast  
2 Journal resubmission BMJ Open  
3 31-May-13

4 **Abbreviations:**

5  
6  
7 AGE: acute gastroenteritis; CI: confidence interval; ER: emergency room; GE:  
8 gastroenteritis; GSK: GlaxoSmithKline; IV: intravenous; RT-PCR: reverse  
9 transcriptase polymerase chain reaction; RV: rotavirus.  
10  
11  
12  
13  
14  
15  
16  
17  
18  
19  
20  
21  
22  
23  
24  
25  
26  
27  
28  
29  
30  
31  
32  
33  
34  
35  
36  
37  
38  
39  
40  
41  
42  
43  
44  
45  
46  
47  
48  
49  
50  
51  
52  
53  
54  
55  
56  
57  
58  
59  
60

EPI-RV-Ivory Coast  
Journal resubmission BMJ Open  
31-May-13

## ABSTRACT

**Objectives:** To estimate the proportion of rotavirus gastroenteritis (RVGE) among children aged less than five years who were diagnosed with acute gastroenteritis (AGE) and admitted to hospitals and emergency rooms (ERs). The seasonal distribution of RVGE and most prevalent RV strains were also assessed.

**Design:** An observational, prospective hospital-based surveillance study.

**Setting:** Five reference pediatric hospitals across Abidjan.

**Participants:** Children aged less than five years, hospitalized/ visiting ERs for AGE as defined by the WHO were enrolled. Written informed consent was obtained from parents/ guardians prior to enrollment. Children who acquired nosocomial infection were excluded from the study.

**Primary and secondary outcome measures:** The proportion of RVGE among AGE hospitalizations and ER visits were expressed with their 95% exact confidence interval (CI). Stool samples were collected from all enrolled children to test for the presence of RV using an enzyme immunoassay. RV positive samples were serotyped using reverse transcriptase polymerase chain reaction.

**Results:** Of 357 children (mean age  $13.6 \pm 11.14$  months) enrolled, 332 were included in the final analyses; 56.3% (187/332) were hospitalized and 43.7% (145/332) were admitted to ER. The proportion of RVGE hospitalizations and ER visits among all AGE was 30.1% (95% CI: 23.6-37.3) and 26.9% (95% CI: 19.9-34.9), respectively. Ninety-five (28.6%) children were RV positive and the highest

1  
2  
3  
4  
5  
6  
7  
8  
9  
10  
11  
12  
13  
14  
15  
16  
17  
18  
19  
20  
21  
22  
23  
24  
25  
26  
27  
28  
29  
30  
31  
32  
33  
34  
35  
36  
37  
38  
39  
40  
41  
42  
43  
44  
45  
46  
47  
48  
49  
50  
51  
52  
53  
54  
55  
56  
57  
58  
59  
60

EPI-RV-Ivory Coast  
Journal resubmission BMJ Open  
31-May-13

number of RVGE cases was observed in children aged 6-11 months. The number of GE cases peaked in July and August 2008; the highest percentage of RV positive cases was observed in January 2008. G1P[8]wild-type and G8P[6] were the most commonly detected strains.

**Conclusion:** RVGE causes substantial morbidity among children under five years of age and remains a health concern in the Republic of Côte d'Ivoire, where implementation of prevention strategies such as vaccination might help to reduce the disease burden.

**Trial registration:** Not applicable

EPI-RV-Ivory Coast  
Journal resubmission BMJ Open  
31-May-13

## ARTICLE SUMMARY

### Article focus

- Rotavirus gastroenteritis (RVGE) disease burden in the Republic of Côte d'Ivoire is substantial and recent data on the epidemiology of RVGE are limited.
- The main focus of this study was to estimate the proportion of RV among young children hospitalized for acute gastroenteritis (AGE) or treated at emergency rooms (ER) for AGE.
- Additionally, we sought to determine the seasonal distribution of RVGE and to identify the prevalent RV types in the study population.

### Key messages

- RVGE accounts for about 28.6% of AGE hospitalizations and 30.1% ER visits in the Republic of Côte d'Ivoire and particularly affects children aged less than 24 months.
- The number of RVGE cases peaked during July and August 2008. The most prevalent RV strains were G1P[8] wild-type and G8P[6].
- Implementation of preventative measure such as RV vaccination could help to reduce the disease burden of RVGE in the Republic of Côte d'Ivoire.

EPI-RV-Ivory Coast  
Journal resubmission BMJ Open  
31-May-13

### Strengths and limitations of this study:

- The study was conducted in large pediatric hospitals across the city and hence our findings are likely to be representative of the whole population.
- The systematic approach followed to enroll children enabled easy identification of AGE cases.
- Only a reduced proportion of all the reported AGE cases could be enrolled in this study and included only severe cases.

EPI-RV-Ivory Coast  
Journal resubmission BMJ Open  
31-May-13

## INTRODUCTION

Wild-type, rotavirus (RV) causes approximately 111 million episodes of gastroenteritis (GE), 25 million clinic visits, two million hospitalizations and over 453,000 deaths per year among children younger than five years of age.[1, 2] It has been reported that RV mortality is the highest among the low income countries in Asia, Africa and Latin America.[3] A systematic review and meta-analysis (2009) of published studies reported that, in sub-Saharan Africa, the overall mortality rate associated with RV infection in children under five years of age was 243.3 (95% CI 187.6–301.7) deaths per 100,000 children.[4] Globally, RV infection rates are highest among children aged less than five years, with approximately 95% children having experienced at least one episode of RVGE by the time they are five years of age.[5]

RVGE is characterized by fever, diarrhea and vomiting that lead to severe dehydration and increased hospitalization. Over 90% of children with RVGE suffer from dehydration-associated mortality due to diarrhea and associated vomiting.[6-8] It has been suggested that RV infections are more common during the cooler months of the year and that RVGE disease burden is similar in both high and low income nations.[1] However, due to malnutrition and lack of access to appropriate treatment facilities, it is children in the low-income countries who die more frequently.[1]

As improvements in hygiene and sanitation have not been associated with reduction in the incidence of RV-associated diseases,[9] vaccination against RV is



1 EPI-RV-Ivory Coast  
2 Journal resubmission BMJ Open  
3 31-May-13

4 therefore considered as a public health priority for low income nations.[10] The  
5 introduction of RV vaccination could have potential and visible benefits to children  
6 aged less than three years, and might assist the reduction of diarrhea-associated  
7 childhood morbidity and mortality in low income countries and of RV-associated  
8 hospitalizations in high income countries.[11, 12]

9 The most common RV serotypes associated with RVGE circulating worldwide are  
10 G1, G2, G3 and G4.[13] In addition to these, G9 has emerged as a globally  
11 important serotype in the last decade.[14] Together, these serotypes are  
12 responsible for 95% worldwide pediatric RVGE cases.[15]

13 In the Republic of Côte d'Ivoire, the epidemiology of RV infection has been  
14 followed in several small studies conducted in Abidjan,[16–21] but recent data on  
15 RVGE disease burden for this region are limited. Data on RVGE disease, the  
16 number of hospitalizations and the number of emergency room (ER) visits following  
17 acute GE (AGE) are critical to formulate effective policies to control RV-related  
18 AGE. These data are also important to fully determine the need for RV vaccines  
19 and understand the possible impact of their introduction.

20 This study aimed to estimate the proportion of RVGE among children younger than  
21 five years of age who were diagnosed with AGE and admitted to hospitals and  
22 ERs. Seasonal distribution of RVGE and identification of prevalent RV types in the  
23 Republic of Côte d'Ivoire was also studied.

EPI-RV-Ivory Coast  
Journal resubmission BMJ Open  
31-May-13

## METHODS

### Study design

This observational, cross-sectional hospital-based surveillance study was conducted across five centers in Abidjan, the Republic of Côte d'Ivoire between December 2007 and February 2009. The study was conducted in accordance with the Good Clinical Practice, the Declaration of Helsinki (version 1996) and the applicable local regulations of the country and written informed consent was obtained from parents/ guardians before children were enrolled.

Children presenting AGE were enrolled in this study by checking the hospital and ER logbooks. Males or females aged less than five years, who were hospitalized or visited ER for AGE ( $\geq 3$  looser than normal stools per day with or without  $\geq 2$  episodes of vomiting within 24 hours) were included in the study. Children were excluded if they acquired AGE by possible nosocomial infection (within 12 hours after hospital admission).

Unique study numbers were sequentially assigned to all enrolled children in order to maintain their confidentiality. Parents/ guardians were interviewed and medical records were reviewed by the site staff to complete the questionnaire and/ or case report form. Information such as demographic parameters (date of birth, gender, height and weight, nutritional status, and area of residence); admission date and diagnosis at admission, date of discharge, diagnosis at discharge and administration of oral and/ or intravenous rehydration/ antibiotics were recorded and encoded in the study database. Details such as body temperature, duration of

EPI-RV-Ivory Coast  
Journal resubmission BMJ Open  
31-May-13

1  
2  
3  
4  
5  
6  
7  
8  
9  
10  
11  
12  
13  
14  
15  
16  
17  
18  
19  
20  
21  
22  
23  
24  
25  
26  
27  
28  
29  
30  
31  
32  
33  
34  
35  
36  
37  
38  
39  
40  
41  
42  
43  
44  
45  
46  
47  
48  
49  
50  
51  
52  
53  
54  
55  
56  
57  
58  
59  
60

diarrhea or vomiting, treatment including hospitalization and behavioral symptoms were also recorded. The severity of RVGE was defined according to the Vesikari Scale (mild: score <7; moderate: score 7–10 and severe: score ≥11).[22]

Stool samples collected within 4–10 days of the onset of GE were refrigerated (4°C–8°C), frozen (-20°C to -70°C) and then transported to Pasteur Institute, Abidjan, within 72 hours of sample collection. RV testing was performed using IDEIA rotavirus kit (DAKO Ltd., Cambridgeshire, UK) provided by the regional laboratory (West Africa Regional Rotavirus Reference laboratory). RV positive stool samples were subsequently tested using reverse transcriptase-polymerase chain reaction (RT-PCR) of the VP7 and VP4 genes followed by reverse hybridization at DDL Diagnostic Laboratory (Rijswijk, the Netherlands) to identify G and P genotypes and to differentiate the presence of wild-type G1 RV from the vaccine strain virus.[23] As a complementary tool, sequence analysis was performed to identify the most prevalent genotypes for samples that yielded an aberrant or unclear pattern. The resulting sequence was analyzed by BLAST search against the GenBank database to determine the RV genotype.[23]

### **Analyses**

All children meeting the pre-defined eligibility criteria were included in the final analyses.

Age at onset, the seasonal distribution of RVGE and the occurrence of RV types were recorded. The occurrence of severe dehydrating RVGE (based on Vesikari

1 EPI-RV-Ivory Coast  
2 Journal resubmission BMJ Open  
3 31-May-13

4 scale,[22]) administered treatment (including intravenous [IV] re-hydration),  
5  
6 duration of hospitalization and outcome were all reported.  
7

8  
9 All statistical analyses were performed using Statistical Analysis System (SAS®)  
10 version 9.2 and the graphs were generated using Microsoft Excel®. Categorical  
11 data such as gender, seasonal distribution and disease severity were presented as  
12 proportions with one decimal. Burden of GE/ RVGE among hospitalizations/ ER  
13 visits were expressed as proportions with their 95% exact confidence interval (CI).  
14  
15 Exploratory analyses of estimation of the crude odds ratio were performed using  
16 univariate logistic regression considering RV status as the outcome variable with  
17 clinical characteristics and discharge outcome as confounding factors. Multinomial  
18 univariate logistic regression was also explored to estimate the association  
19 between outcome at discharge as the dependent variable and RV status and  
20 nutritional status as the independent factors. The 95% Walds CI was also  
21 estimated.  
22  
23  
24  
25  
26  
27  
28  
29  
30  
31  
32  
33  
34  
35  
36  
37  
38  
39  
40  
41  
42  
43  
44  
45  
46  
47  
48  
49  
50  
51  
52  
53  
54  
55  
56  
57  
58  
59  
60

EPI-RV-Ivory Coast  
Journal resubmission BMJ Open  
31-May-13

## RESULTS

### Demographic characteristics

A total of 1330 children (917 hospitalized and 413 visiting ERs) with AGE were identified from hospital logs, of whom 357 children were enrolled into the study. Informed consent was not collected from the patents/ guardians of 973 children, due to parent refusal, samples not collected, and failure of the surveillance to capture the children. The mean age (standard deviation) of enrolled children was 13.6 months ( $\pm$  11.14 months) (Table 1).

**Table 1: Demographic characteristics of enrolled children (N = 357)**

| Characteristics | Parameters          | Total                  |                | Emergency Room |      | Hospitalized |      |
|-----------------|---------------------|------------------------|----------------|----------------|------|--------------|------|
|                 |                     | (N <sup>a</sup> = 357) |                | (N = 161)      |      | (N = 196)    |      |
|                 |                     | n <sup>b</sup>         | % <sup>c</sup> | n              | %    | n            | %    |
|                 | N                   | 357                    | -              | 161            | -    | 196          | -    |
| Age (Months)    | Mean                | 13.6                   | -              | 13.7           | -    | 13.5         | -    |
|                 | SD <sup>d</sup>     | 11.14                  | -              | 11.39          | -    | 10.96        | -    |
|                 | Gender              | Female                 | 152            | 42.6           | 69   | 42.9         | 83   |
|                 | Male                | 205                    | 57.4           | 92             | 57.1 | 113          | 57.7 |
|                 | Live in the Abidjan | 347                    | 97.2           | 158            | 98.1 | 189          | 96.4 |

<sup>a</sup>Number of children

<sup>b</sup>Number of children in a given category

<sup>c</sup>n / N x 100

<sup>d</sup>standard deviation

EPI-RV-Ivory Coast  
Journal resubmission BMJ Open  
31-May-13

A total of 332 children were included in the final analysis; there were 25 exclusions: two did not meet the inclusion/ exclusion criteria (protocol violation), stool samples were not collected or analyzed for RV (due to insufficient stool sample) for the remaining 23 children.

Among those included in the final analyses, 56.3% (187/332) children were hospitalized and the remaining 43.7% (145/332) visited the ER.

### Proportion of GE and RVGE hospitalizations

The proportion of all AGE hospitalizations and ER visits diagnosed with RVGE was 30.1% (n = 56; 95% CI: 23.6–37.3) and 26.9% (n = 39; 95% CI: 19.9–34.9), respectively.

The number of children hospitalized and those who visited the ER for GE stratified by age groups is shown in Table 2. Ninety-five children (28.6%) were RV positive, of which over 80% occurred in children aged less than 24 months (Table 2). The highest number of RVGE cases was reported in children aged 6–11 months (40.0% [38/95]).

**Table 2: Distribution of GE cases by ER visits, hospitalizations and RV status by age groups (N = 332)**

| Age (months) | Emergency Room       |                | Hospitalized |      | RV positive         |      | RV negative |      | RV missing |       |
|--------------|----------------------|----------------|--------------|------|---------------------|------|-------------|------|------------|-------|
|              | N <sup>a</sup> = 145 |                | N = 187      |      | N <sup>a</sup> = 95 |      | N = 236     |      | N = 1      |       |
|              | n <sup>b</sup>       | % <sup>c</sup> | n            | %    | n                   | %    | n           | %    | n          | %     |
| 0–5          | 29                   | 20             | 46           | 24.6 | 16                  | 16.8 | 58          | 24.6 | 1          | 100.0 |

EPI-RV-Ivory Coast  
Journal resubmission BMJ Open  
31-May-13

| Age (months) | Emergency Room<br>N <sup>a</sup> = 145 |                | Hospitalized<br>N = 187 |      | RV positive<br>N <sup>a</sup> = 95 |      | RV negative<br>N = 236 |      | RV missing<br>N = 1 |     |
|--------------|----------------------------------------|----------------|-------------------------|------|------------------------------------|------|------------------------|------|---------------------|-----|
|              | n <sup>b</sup>                         | % <sup>c</sup> | n                       | %    | n                                  | %    | n                      | %    | n                   | %   |
| 6–11         | 47                                     | 32.4           | 57                      | 30.5 | 38                                 | 40.0 | 66                     | 28.0 | 0                   | 0.0 |
| 12–23        | 47                                     | 32.4           | 55                      | 29.4 | 33                                 | 34.7 | 69                     | 29.2 | 0                   | 0.0 |
| 24–35        | 14                                     | 9.7            | 13                      | 7.0  | 7                                  | 7.4  | 20                     | 8.5  | 0                   | 0.0 |
| 36–47        | 4                                      | 2.8            | 12                      | 6.4  | 0                                  | 0.0  | 16                     | 6.8  | 0                   | 0.0 |
| 48–59        | 4                                      | 2.8            | 4                       | 2.1  | 1                                  | 1.1  | 7                      | 3.0  | 0                   | 0.0 |

<sup>a</sup>Number of children

<sup>b</sup>Number of children in a given category

<sup>c</sup>n / N x 100

The seasonal distribution of GE hospitalizations attributed to RV infection is shown in Figure 1. The number of GE cases was highest in July and August 2008 and the percentage of RV positive cases was highest in January 2008.

### Clinical characteristics of GE and RVGE hospitalizations

Among both RV positive and RV negative children, severe GE (score  $\geq 11$  on the Vesikari scale) was reported in 64.2% (61/95) and 55.5% (131/236) children before hospitalization, respectively (Table 3).

The percentage of children recording the symptoms associated with GE (diarrhea, vomiting and fever) was similar across RV positive and negative groups. However, a significant (P-value = 0.0037) association between vomiting and RV positive status was observed prior to hospitalization (Table 3).

EPI-RV-Ivory Coast  
Journal resubmission BMJ Open  
31-May-13

Nutritional status based on weight indicated that children who were adequately and moderately malnourished were similar across both RV positive and negative groups. However, a higher number of severely malnourished children were observed in the RV negative group (Table 3).

Oral rehydration was the most common treatment used for GE in both RV positive and negative groups. At discharge, the majority of children among both RV positive and RV negative groups (71.6% [68/95] and 78.0% [184/236], respectively) had ongoing GE, while 3.4% (8/236) of children in the RV negative group died (Table 3). Among the children who died, all children except one (87.5% [7/8]) were severely malnourished. The unadjusted odds ratio estimation indicated that the severely malnourished children had 22.2 (95% CI: 2.5–198.8) times higher risk of dying when compared to children with adequate nutritional status (P-value = 0.0056).

**Table 3: Clinical characteristics of children by RV status (N=331)**

| Characteristic                                     | RV positive<br>(N <sup>a</sup> = 95)<br>n <sup>b</sup> (% <sup>c</sup> ) | RV negative<br>(N = 236)<br>n (%) | P-value |
|----------------------------------------------------|--------------------------------------------------------------------------|-----------------------------------|---------|
| <b>Severity<sup>d</sup> before hospitalization</b> |                                                                          |                                   |         |
| Mild (<7)                                          | 6 (6.3)                                                                  | 27 (11.4)                         | 0.2300* |
| Moderate (7–10)                                    | 28 (29.5)                                                                | 78 (33.1)                         |         |
| Severe (≥11)                                       | 61 (64.2)                                                                | 131 (55.5)                        |         |
| <b>Severity during hospitalization</b>             |                                                                          |                                   |         |



EPI-RV-Ivory Coast  
Journal resubmission BMJ Open  
31-May-13

|                                                  |            |            |          |
|--------------------------------------------------|------------|------------|----------|
| Mild (<7)                                        | 28 (29.5)  | 55 (23.3)  |          |
| Moderate (7–10)                                  | 36 (37.9)  | 115 (48.7) | 0.1946*  |
| Severe (≥11)                                     | 31 (32.6)  | 66 (28.0)  |          |
| <b>Symptoms before hospitalization</b>           |            |            |          |
| Diarrhea                                         | 95 (100.0) | 235 (99.6) | 1.0000** |
| Vomiting                                         | 81 (85.3)  | 170 (72.0) | 0.0037** |
| Fever                                            | 44 (46.3)  | 116 (49.2) | 0.8557*  |
| <b>Symptoms during hospitalization</b>           |            |            |          |
| Diarrhea                                         | 90 (94.7)  | 229 (97.0) | 0.3359** |
| Vomiting                                         | 42 (44.2)  | 95 (40.3)  | 0.8065** |
| Fever                                            | 47 (49.5)  | 118 (50.0) | 0.9639** |
| <b>Treatment received before hospitalization</b> |            |            |          |
| Oral rehydration                                 | 39 (41.1)  | 96 (40.7)  | 0.7580*  |
| IV rehydration                                   | 1 (1.1)    | 1 (0.4)    | 0.5810** |
| Antibiotics                                      | 25 (26.3)  | 47 (19.9)  | 0.3701*  |
| <b>Treatment received during hospitalization</b> |            |            |          |
| Oral rehydration                                 | 67 (70.5)  | 179 (75.8) | 0.2049** |
| IV rehydration                                   | 52 (54.7)  | 125 (53.0) | 0.9507** |
| Antibiotics                                      | 30 (31.6)  | 81 (34.3)  | 0.4843** |
| <b>Classification of nutrition</b>               |            |            |          |
| Overweight                                       | 5 (5.3)    | 8 (3.4)    |          |
| Adequate (Normal)                                | 66 (69.5)  | 152 (64.4) |          |
| Moderately malnourished                          | 15 (15.8)  | 32 (13.6)  | 0.1981*  |
| Severely malnourished                            | 9 (9.5)    | 44 (18.6)  |          |
| <b>Outcome at discharge</b>                      |            |            |          |

EPI-RV-Ivory Coast  
Journal resubmission BMJ Open  
31-May-13

|             |           |            |          |
|-------------|-----------|------------|----------|
| Recovered   | 27 (28.4) | 40 (16.9)  |          |
| Ongoing GE  | 68 (71.6) | 184 (78.0) | 0.0145** |
| Transferred | 0 (0.0)   | 4 (1.7)    |          |
| Died        | 0 (0.0)   | 8 (3.4)    |          |

Note: One child was excluded from analysis as RV status was not determined.

<sup>a</sup>Number of children

<sup>b</sup>Number of children in a given category

<sup>c</sup> $n / N \times 100$

<sup>d</sup>Severity using the 20-point Vesikari scale

\*chi square P-value

\*\*Fisher Exact test P-value

### RV type distribution

Fifty three of the 95 RV positive stool samples were assessed in this study. Among these, the most prevalent RV types were G1P[8] wild-type (34.0% [18/53]) and G8P[6] (18.9% [10/53]). Mixed RV types were detected in 30.2% (16/53). The RV vaccine strain (G1P[8] vaccine strain) was not detected in any of the samples. The other common RV types detected are depicted by decreasing order of prevalence in [Figure 2](#).

1 EPI-RV-Ivory Coast  
2 Journal resubmission BMJ Open  
3 31-May-13

## 4 **DISCUSSION**

5  
6  
7 This study describing RVGE disease burden found that RV infection is the primary  
8 cause of hospitalization due to GE in children aged less than five years in the  
9  
10  
11  
12 Republic of Côte d'Ivoire.

13  
14  
15 We detected RV in 30.1% and 26.9% children hospitalized and visiting the ER,  
16  
17  
18  
19  
20  
21  
22  
23  
24  
25  
26  
27  
28  
29  
30  
31  
32  
33  
34  
35  
36  
37  
38  
39  
40  
41  
42  
43  
44  
45  
46  
47  
48  
49  
50  
51  
52  
53  
54  
55  
56  
57  
58  
59  
60

respectively, which is consistent with an earlier epidemiological study in Abidjan that demonstrated the general prevalence of RVGE in children less than five years of age to be 27.9% between 1997 and 2000.[21] In addition, a review of published studies (1975 to 1992) of RVGE in Africa detected RV in 24–29% of children hospitalized for diarrhea.[9]

In the present study, RV disease burden was predominantly observed among young children (aged 6–24 months), which is in line with previous studies conducted across the African continent.[9] A study conducted in Nigeria showed that over 90.0% of RVGE positive cases were observed in children aged less than two years[24] and two independent studies conducted in Egypt (1995–1996) [25] and Libya (October 2007–September 2008) [26] indicated that the incidence of RVGE was highest among children aged 6–11 months; all comparable to the results of the present study.

As observed in previous studies conducted in sub-Saharan African regions between 1975 and 1992,[9] most GE cases in this study were observed between July and August of 2008.

EPI-RV-Ivory Coast  
Journal resubmission BMJ Open  
31-May-13

1  
2  
3  
4 Almost all children who died following AGE cases in this study were severely  
5  
6 malnourished, indicating the importance of nutritional status in potentially  
7  
8 determining the outcome of AGE. Previous reports substantiate these findings  
9  
10 where malnourishment has been associated with a considerable risk of diarrhea-  
11  
12 associated mortality.[27, 28]  
13  
14

15  
16  
17 Circulation of mixed RV types in the African countries have been reported  
18  
19 previously,[29, 30] and in this study, although wild-type G1P[8] was the most  
20  
21 commonly detected (34.0% [18/53]) RV type, several (30.2% [16/53]) mixed RV  
22  
23 types were detected in this study.  
24  
25

26  
27 There is no available anti-viral therapy for RV infection[31] and the management of  
28  
29 RVGE includes replacement of fluids and electrolytes and improvements in  
30  
31 sanitation and water supply.[32] Antibiotic treatment is not justified during RVGE  
32  
33 and its use is limited to cases with documented bacterial co-infection. However, it  
34  
35 has been suggested that improvements in hygiene and provision of safe water  
36  
37 supply may not be as effective in the prevention of RVGE as they are to other  
38  
39 causes of GE.[32]  
40  
41  
42

43  
44 Previous studies have established that RV vaccination confers protection against  
45  
46 severe RVGE disease and has helped relieve the global burden of this disease  
47  
48 [33–36] and more specifically in similar settings in Asia, Africa and Latin  
49  
50 America.[29, 37, 38] The efficacy of RV vaccines against severe RVGE has been  
51  
52 found to be 59% in South Africa and Malawi [39] and 64% in Kenya, Ghana and  
53  
54 Mali.[40] RV vaccination may therefore represent the most effective primary public  
55  
56  
57  
58  
59  
60

1 EPI-RV-Ivory Coast  
2 Journal resubmission BMJ Open  
3 31-May-13

4 health intervention against RVGE. Indeed in 2009, the world health organization  
5 (WHO) recommended the inclusion of RV vaccines in the routine childhood  
6 vaccine programs of all countries.[41] In the Republic of Côte d'Ivoire, RV vaccines  
7 are available in the private sector; however, no RV vaccine is currently included in  
8 the universal mass vaccination program.

9 This study provided baseline epidemiological data that will allow policy makers to  
10 assess the magnitude of the RV problem and determine the need for the  
11 implementation of prevention strategies in the Republic of Côte d'Ivoire. The  
12 inclusion of a RV vaccine might aid to reduce the burden of AGE and AGE-  
13 associated hospitalizations.

14 The results of this study need to be interpreted in the light of several strengths and  
15 limitations. Among the strengths, the systematic approach followed in this study to  
16 enroll children by checking the hospital and ER logbooks enabled easy  
17 identification of AGE cases using standard case definitions. Secondly, the study  
18 was conducted in reference hospitals that reported over 1,300 AGE cases  
19 annually, which complies with the recommendations of WHO's generic protocol for  
20 hospital-based surveillance to estimate the burden of RVGE in children [42]. By  
21 including multiple centers, these data more closely represent the population in  
22 Abidjan, Republic of Côte d'Ivoire. In addition, the quality check processes  
23 performed on the laboratory testing of RV positive samples provides credibility to  
24 the results.

EPI-RV-Ivory Coast  
Journal resubmission BMJ Open  
31-May-13

1  
2  
3  
4 However, the study results need to be interpreted with caution due to some of the  
5  
6 limitations. The possibility of selection bias might be considered since a large  
7  
8 number of children presenting with GE were not enrolled and subsequently not  
9  
10 tested for RV. Hence, the reported prevalence of RVGE might have been affected  
11  
12 by the selection of only severe GE cases with more severe disease characteristics,  
13  
14 including longer hospital stays. Nonetheless, this study provides a realistic picture  
15  
16 of the role of RV among more severe cases of RVGE, which incur direct and  
17  
18 indirect medical costs and impact public health in this setting. In addition, most  
19  
20 subjects who were not enrolled either were not captured during surveillance or  
21  
22 were not consented to participate in the study. Secondly, only 53 out of 95 RV  
23  
24 positive stool samples were available for strain identification which limits the  
25  
26 possibility of describing the circulating strains. Nevertheless, by using a reference  
27  
28 laboratory with validated techniques and experience for PCR confirmation, it was  
29  
30 possible to provide accurate estimates for the identified strains. Lastly, the  
31  
32 seasonality of RV and the variation in circulating RV strains could not been  
33  
34 considered as the surveillance activities were conducted for just one year.  
35  
36  
37  
38  
39  
40  
41  
42  
43  
44  
45  
46  
47  
48  
49  
50  
51  
52  
53  
54  
55  
56  
57  
58  
59  
60

1 EPI-RV-Ivory Coast  
2 Journal resubmission BMJ Open  
3 31-May-13

## 4 **CONCLUSION**

7 RVGE in children aged less than five years continues to be a major public health  
8 challenge in the Republic of Côte d'Ivoire. The disease which peaks in July and  
9 August, mainly affects infants aged 6–11 months. Wild-type G1P[8] and G8P[6]  
10 were the most frequently reported RV types. The inclusion of a RV vaccine into  
11 preventative programs disease in the Republic of Côte d'Ivoire might help to  
12 reduce the disease burden of RVGE.  
13  
14  
15  
16  
17  
18  
19  
20  
21  
22  
23  
24  
25  
26  
27  
28  
29  
30  
31  
32  
33  
34  
35  
36  
37  
38  
39  
40  
41  
42  
43  
44  
45  
46  
47  
48  
49  
50  
51  
52  
53  
54  
55  
56  
57  
58  
59  
60

EPI-RV-Ivory Coast  
Journal resubmission BMJ Open  
31-May-13

## Acknowledgements

The authors would like to thank Véronique Agbaya-Akran Awo and Mariam Drame for their contribution to the study conduct at the site; Vrushali Sanghrajka for statistical inputs; Dr. Lamine Soumahoro (head of Medical Department) and Dr. Marie-José Anguibi-Pokou, Dominique Luyts and Karin Hallez (all employed by GlaxoSmithKline group of companies) for their contribution to the study; Dr. Ekaza Euloge from Pasteur Institute of Côte d'Ivoire for his assistance in molecular testing in Abidjan; Dr. Berah and Dr. Niamen for sample collection; DDL Diagnostic Laboratory (The Netherlands) for performing RT-PCR and nested PCR to determine rotavirus G and P types. The authors would also like to thank Harshith Bhat (employed by GlaxoSmithKline group of companies) for medical writing, Abdelilah Ibrahim (XPE Pharma and Science for GlaxoSmithKline group of companies) and Valentine Wascotte for Publication coordination and Rodrigo DeAntonio for intellectual inputs (both employed by GlaxoSmithKline group of companies).

## Contributors

AKC was the principal investigator and contributed to the conception, design, analysis and interpretation of the study. AKV and YAJ coordinated the study together with AKC and contributed to the interpretation of the results. All authors participated in the development of this manuscript.



1 EPI-RV-Ivory Coast  
2 Journal resubmission BMJ Open  
3 31-May-13

## 4 **Funding**

5  
6  
7 GlaxoSmithKline Biologicals SA was the funding source and was involved in all  
8 stages of the study conduct and analysis. GlaxoSmithKline Biologicals SA also  
9  
10 took in charge all costs associated with the development and the publishing of the  
11  
12 present manuscript.  
13  
14

## 15 **Competing interests**

16  
17 All the authors have no competing interest to declare.  
18  
19

## 20 **Trademark**

21  
22 DAKO RV EIA is a trademark of DAKO Ltd., Cambridgeshire, UK.  
23  
24  
25  
26  
27  
28  
29  
30  
31  
32  
33  
34  
35  
36  
37  
38  
39  
40  
41  
42  
43  
44  
45  
46  
47  
48  
49  
50  
51  
52  
53  
54  
55  
56  
57  
58  
59  
60

EPI-RV-Ivory Coast  
Journal resubmission BMJ Open  
31-May-13

## REFERENCES

1. Parashar UD, Hummelman EG, Bresee JS, *et al.* Global illness and deaths caused by rotavirus disease in children. *Emerg Infect Dis* 2003;**9**:565–71.
2. Tate JE, Burton AH, Boschi-Pinto C, *et al.* WHO-coordinated Global Rotavirus Surveillance Network. 2008 estimate of worldwide rotavirus-associated mortality in children younger than 5 years before the introduction of universal rotavirus vaccination programmes: a systematic review and meta-analysis. *Lancet Infect Dis* 2012;**12**(2):136–41
3. Phua KB, Emmanuel SC, Goh P, *et al.* A rotavirus vaccine for infants: The Asian experience. *Ann Acad Med Singapor* 2006;**35**:38–44.
4. Sanchez-Padilla E, Grais RF, Guerin PJ, *et al.* Burden of disease and circulating serotypes of rotavirus infection in sub-Saharan Africa: systematic review and meta-analysis. *Lancet Infect Dis* 2009;**9**(9):567–76.
5. Parashar UD, Bresee JS, Gentsch JR, *et al.* Rotavirus. *Emerg Infect Dis* 1998;**4**:561–70.
6. Glass RI, Kilgore PE, Holman RC, *et al.* The epidemiology of rotavirus diarrhea in the United States: surveillance and estimates of disease burden. *J Infect Dis* 1996;**174**:S5–11.
7. Gurwith M, Wenman W, Gurwith D, *et al.* Diarrhea among infants and young children in Canada: a longitudinal study in three northern communities. *J Infect Dis* 1983;**147**:685–92.

EPI-RV-Ivory Coast  
Journal resubmission BMJ Open  
31-May-13

8. Rodriguez WJ, Kim HW, Brandt CD, *et al.* Longitudinal study of rotavirus infection and gastroenteritis in families served by a pediatric medical practice: clinical and epidemiologic observations. *Pediatr Infect Dis J* 1987;**6**:170–6.
9. Cunliffe NA, Kilgore PE, Bresee JS, *et al.* Epidemiology of rotavirus diarrhea in Africa: a review to assess the need for rotavirus immunization. *Bull WHO* 1998;**76**:525–37.
10. Naficy AB, Abu-Elyazeed R, Holmes JL, *et al.* Epidemiology of rotavirus diarrhea in Egyptian children and implications for disease control. *Am J Epidemiol* 1999;**150**:770–6.
11. Cunliffe NA, Nakagomi O. A critical time for rotavirus vaccines: a review. *Exp Rev Vac* 2005;**4**:521–32.
12. Glass RI, Bresse JS, Turcios R, *et al.* Rotavirus vaccines: Targeting the developing world. *J Infect Dis* 2005;**192**:S160–6.
13. Steele AD, Ivanoff B. Rotavirus strains circulating in Africa during 1996–1999: emergence of G9 strains and P[6] strains. *Vaccine* 2003;**21**:361–7.
14. Yang J, Wang T, Wang Y, *et al.* Emergence of human rotavirus group A genotype G9 strains, Wuhan, China. *Emerg Infect Dis* 2007;**13**:1587–9.
15. Atkinson W, Hamborsky J, McIntyre L, *et al.* Epidemiology and Prevention of Vaccine-Preventable Diseases. Washington, DC: Public Health Foundation; 2008.

EPI-RV-Ivory Coast  
Journal resubmission BMJ Open  
31-May-13

16. Cowpli-Bony M, Loukou YG, Teby A, *et al.* Technique immunoenzymatique epidemiologie des diarrhees aiguës a rotavirus chez 115 enfants diarrheiques atteints de malnutrition a Abidjan. *Rev Med Côte d'Ivoire* 1987;**79**:21–5.
17. Lougou YG, Selly E. Sous-groupes de rotavirus humains en Côte d'Ivoire determines par immunoenzymologie. *Rev Med Côte d'Ivoire* 1987;**81**:4–9.
18. Akoua-Koffi C, Faye-Kette H, Kouakou K, *et al.* Interet de l'utilisation d'un test au latex (Rotalex) pour le depistage de rotavirus dans les selles diarrheiques a Abidjan. *Med Afr Noire* 1993;**40**:599–602.
19. Akran VA, Akoua-Koffi C, Hette K, *et al.* Electrophoretotypes of rotavirus in children 15 years of age in Abidjan, Côte d'Ivoire in 1997. *Afr J Health Sci* 2001;**8**:33–8.
20. Niangue-Beugre NN, Couitchere L, Oulai SM, *et al.* Aspect epidemiologiques, cliniques et etiologiques des diarrhees aiguës des enfants ages de 1 mois a 5 ans recus dans le service de pediatrie du CHU de Treichville (Côte d'Ivoire). *Arch de Pediatrie* 2006;**13**:395–8.
21. Akoua-Koffi C, Akran V, Peenze I, *et al.* Epidemiological and virological aspects rotavirus diarrhea in Abidjan, Côte d'Ivoire (1997–2000). *Bull Soc Pathol Exot* 2007;**100**:246–9.
22. Ruuska T, Vesikari T. Rotavirus disease in Finnish children: Use of numerical scores for clinical severity of diarrheal episodes. *Scand J Infect Dis* 1990;**22**:259–67.

1  
2  
3  
4  
5  
6  
7  
8  
9  
10  
11  
12  
13  
14  
15  
16  
17  
18  
19  
20  
21  
22  
23  
24  
25  
26  
27  
28  
29  
30  
31  
32  
33  
34  
35  
36  
37  
38  
39  
40  
41  
42  
43  
44  
45  
46  
47  
48  
49  
50  
51  
52  
53  
54  
55  
56  
57  
58  
59  
60

EPI-RV-Ivory Coast  
Journal resubmission BMJ Open  
31-May-13

23. van Doorn LJ, Kleter B, Hoefnagel E, *et al.* Detection and genotyping of human rotavirus VP4 and VP7 genes by reverse transcriptase PCR and reverse hybridization. *J Clin Microbiol* 2009;**47**:2704–12.
24. Junaid SA, Umeh C, Olabode AO, *et al.* Incidence of rotavirus infection in children with gastroenteritis attending Jos university teaching hospital, Nigeria. *Viol J* 2011;**8**:233.
25. Khoury H, Ogilvie I, El Khoury AC, *et al.* Burden of rotavirus gastroenteritis in the Middle Eastern and North African pediatric population. *BMC Infect Dis* 2011;**11**:9.
26. Abugalia M, Cuevas L, Kirby A, *et al.* Clinical features and molecular epidemiology of rotavirus and norovirus infections in Libyan children. *J Med Virol* 2011;**83**:1849–56.
27. Ochoa TJ, Salazar-Lindo E, Cleary TG. Management of children with infection-associated persistent diarrhea. *Semin Pediatr Infect Dis* 2004;**15**:229–36.
28. Uysal G, Sökmen A, Vidinlisan S. Clinical risk factors for fatal diarrhea in hospitalized children. *Indian J Pediatr* 2000;**67**:329–33.
29. Armah GE, Steele AD, Esona MD, *et al.* Diversity of rotavirus strains circulating in West Africa from 1996 to 2000. *J Infect Dis* 2010;**202**(S1):S64–71.
30. Todd S, Page NA, Steele DA, *et al.* Rotavirus strain types circulating in Africa: Review of Studies Published during 1997–2006. *J Infect Dis* 2010;**202**:S34–42.

EPI-RV-Ivory Coast  
Journal resubmission BMJ Open  
31-May-13

- 1  
2  
3  
4  
5  
6  
7  
8  
9  
10  
11  
12  
13  
14  
15  
16  
17  
18  
19  
20  
21  
22  
23  
24  
25  
26  
27  
28  
29  
30  
31  
32  
33  
34  
35  
36  
37  
38  
39  
40  
41  
42  
43  
44  
45  
46  
47  
48  
49  
50  
51  
52  
53  
54  
55  
56  
57  
58  
59  
60
31. Dennehy PH. Transmission of rotavirus and other enteric pathogens in the home. *Pediatr Infect Dis J* 2000;**19**:S103–5.
32. Parashar UD, Gibson CJ, Bresse JS, *et al.* Rotavirus and severe childhood diarrhea. *Emerg Infect Dis* 2006;**12**:304–6.
33. Paulke-Korienk M, Rendi-Wagner P, Kundi M, *et al.* Universal mass vaccination against rotavirus gastroenteritis: impact on hospitalization rates in Austrian children. *Pediatr Infect Dis J* 2010;**29**:319–23.
34. Richardson V, Hernandez-Pichardo J, Quintanar-Solares M, *et al.* Reduction in childhood diarrhea deaths after rotavirus vaccine introduction in Mexico. *N Engl J Med* 2010;**362**:299–305.
35. Yen C, Tate JE, Patel MM, *et al.* Rotavirus vaccines: update on global impact and future priorities. *Hum Vaccin* 2011;**7**:1282–90.
36. Centers for Disease Control. Rotavirus surveillance—worldwide, 2001–2008. *MMWR Morb Mortal Wkly Rep* 2008;**57**:1255–7.
37. Ruiz-Palacios GM, Pérez-Schael I, Velázquez FR, *et al.* Safety and efficacy of an attenuated vaccine against severe rotavirus gastroenteritis. *New Engl J Med* 2006;**354**:11–22.
38. Linhares AC, Velázquez FR, Pérez-Schael I, *et al.* Efficacy and safety of an oral live attenuated human rotavirus vaccine against rotavirus gastroenteritis during the first 2 years of life in Latin American infants: randomized, double-blind controlled study. *Lancet* 2008;**371**:1181–99.

1 EPI-RV-Ivory Coast  
2 Journal resubmission BMJ Open  
3 31-May-13

- 4 39. Madhi SA, Cunliffe NA, Steele D, *et al.* Effect of human rotavirus vaccine on  
5 severe diarrhea in African infants. *N Engl J Med* 2010;**362**:289–98.  
6  
7  
8  
9  
10 40. Armah GE, Sow SO, Breiman RF, *et al.* Efficacy of pentavalent rotavirus  
11 vaccine against severe rotavirus gastroenteritis in infants in developing  
12 countries in sub-Saharan Africa: a randomized, double-blind, placebo-controlled  
13 trial. *Lancet* 2010;**376**:606–14.  
14  
15  
16  
17  
18 41. Meeting of the Strategic Advisory Group of Experts on immunization, October  
19 2009 – conclusions and recommendations. *Wkly Epidemiol Rec* 2009;**84**:517–  
20 32.  
21  
22  
23  
24  
25  
26  
27 42. World Health Organization. Generic protocols for (i) hospital-based surveillance  
28 to estimate the burden of rotavirus gastroenteritis in children and (ii) a  
29 community-based survey on utilization of health care services for gastroenteritis  
30 in children. *Vaccine Assessment and Monitoring team of the Department of*  
31 *Vaccines and Biologicals*. 2002, Vol. WHO/V&B/02.15.  
32  
33  
34  
35  
36  
37  
38  
39  
40  
41  
42  
43  
44  
45  
46  
47  
48  
49  
50  
51  
52  
53  
54  
55  
56  
57  
58  
59  
60

EPI-RV-Ivory Coast  
 Journal resubmission BMJ Open  
 31-May-13

Figure 1: Seasonality of acute GE and RVGE hospitalizations (N=331)

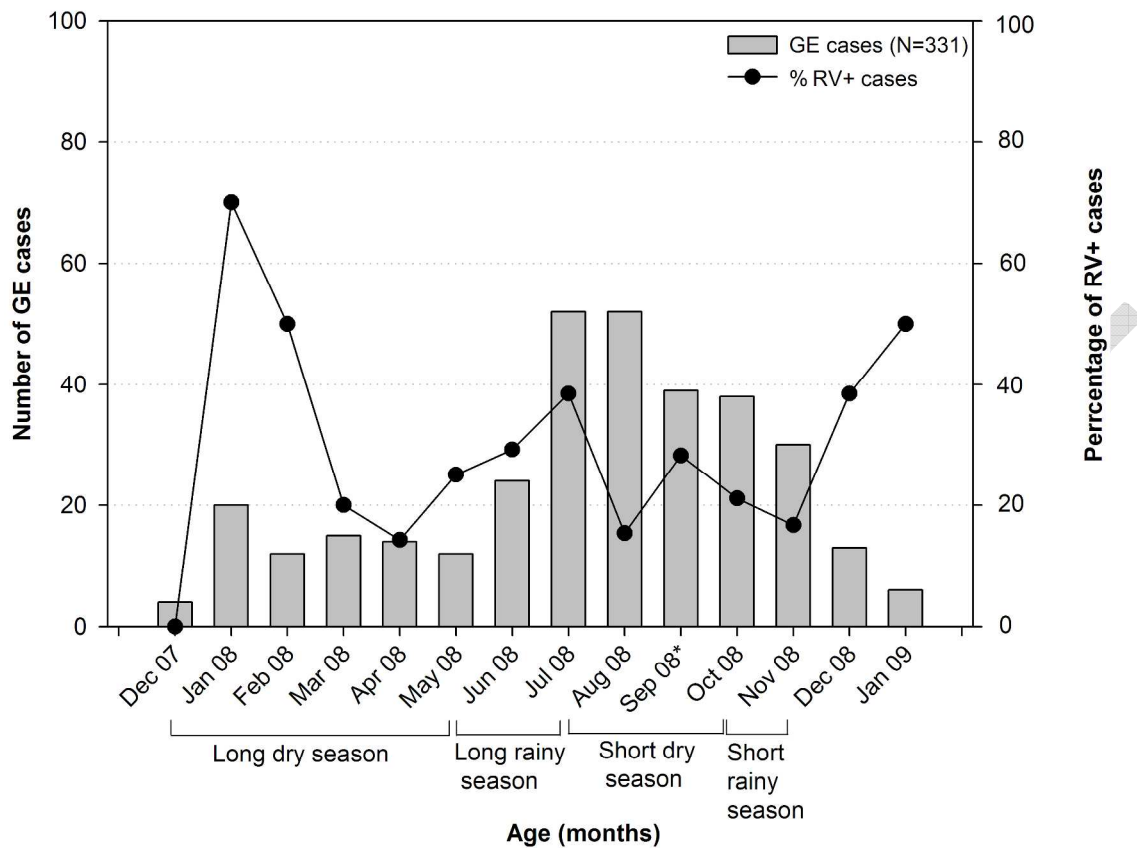

CONFIDENTIAL - Review only

1  
2  
3  
4  
5  
6  
7  
8  
9  
10  
11  
12  
13  
14  
15  
16  
17  
18  
19  
20  
21  
22  
23  
24  
25  
26  
27  
28  
29  
30  
31  
32  
33  
34  
35  
36  
37  
38  
39  
40  
41  
42  
43  
44  
45  
46  
47  
48  
49  
50  
51  
52  
53  
54  
55  
56  
57  
58  
59  
60



EPI-RV-Ivory Coast  
 Journal resubmission BMJ Open  
 31-May-13

**Figure 2: Distribution of RV G and P types (N=331)**

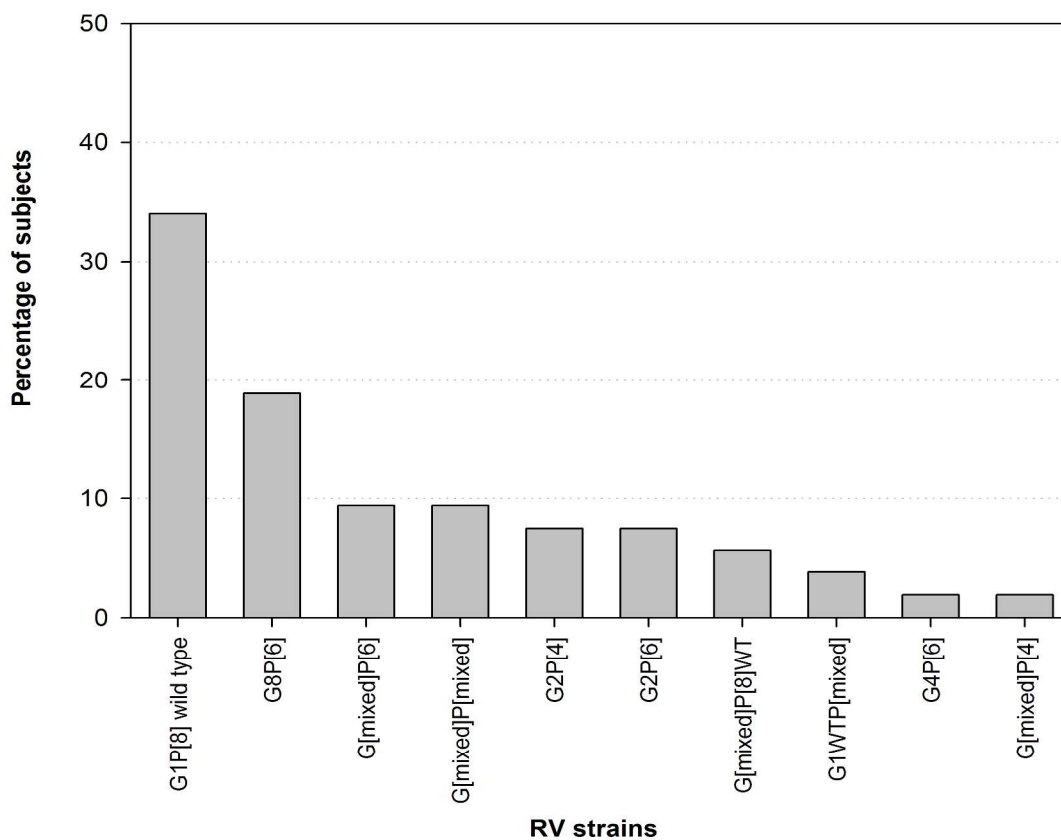

CONFIDENTIAL  
 Review only

1  
2  
3  
4  
5  
6  
7  
8  
9  
10  
11  
12  
13  
14  
15  
16  
17  
18  
19  
20  
21  
22  
23  
24  
25  
26  
27  
28  
29  
30  
31  
32  
33  
34  
35  
36  
37  
38  
39  
40  
41  
42  
43  
44  
45  
46  
47  
48  
49  
50  
51  
52  
53  
54  
55  
56  
57  
58  
59  
60

1  
2  
3  
4  
5  
6  
7  
8  
9  
10  
11  
12  
13  
14  
15  
16  
17  
18  
19  
20  
21  
22  
23  
24  
25  
26  
27  
28  
29  
30  
31  
32  
33  
34  
35  
36  
37  
38  
39  
40  
41  
42  
43  
44  
45  
46  
47  
48  
49  
50  
51  
52  
53  
54  
55  
56  
57  
58  
59  
60

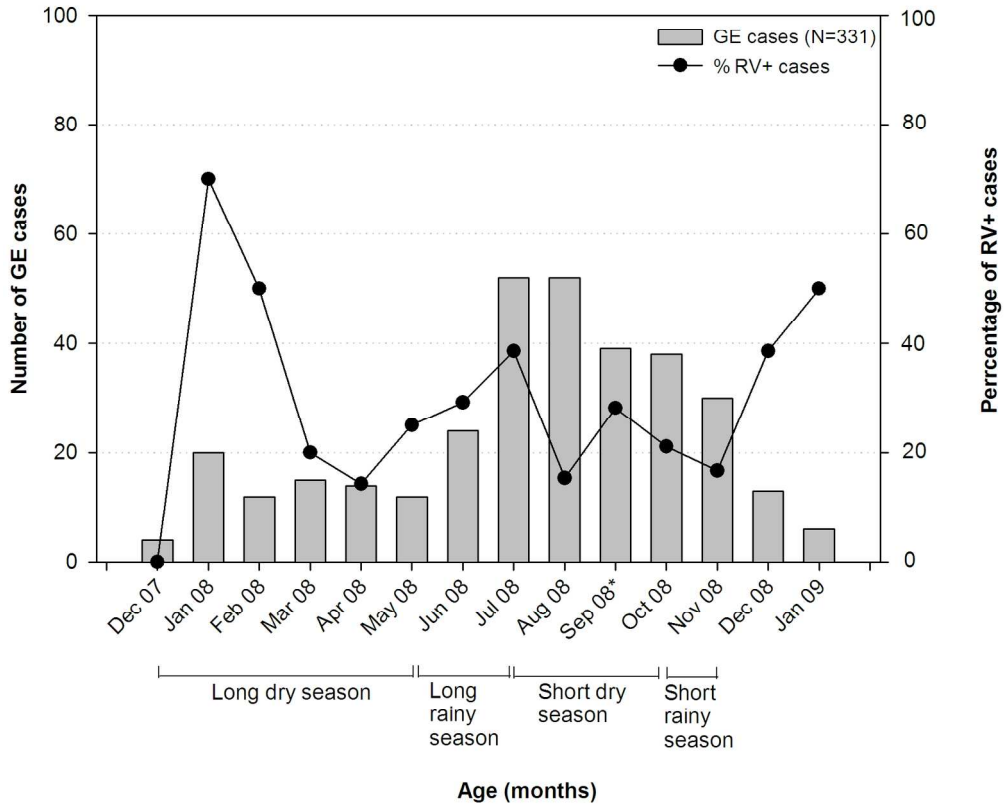

162x141mm (300 x 300 DPI)

For peer review only

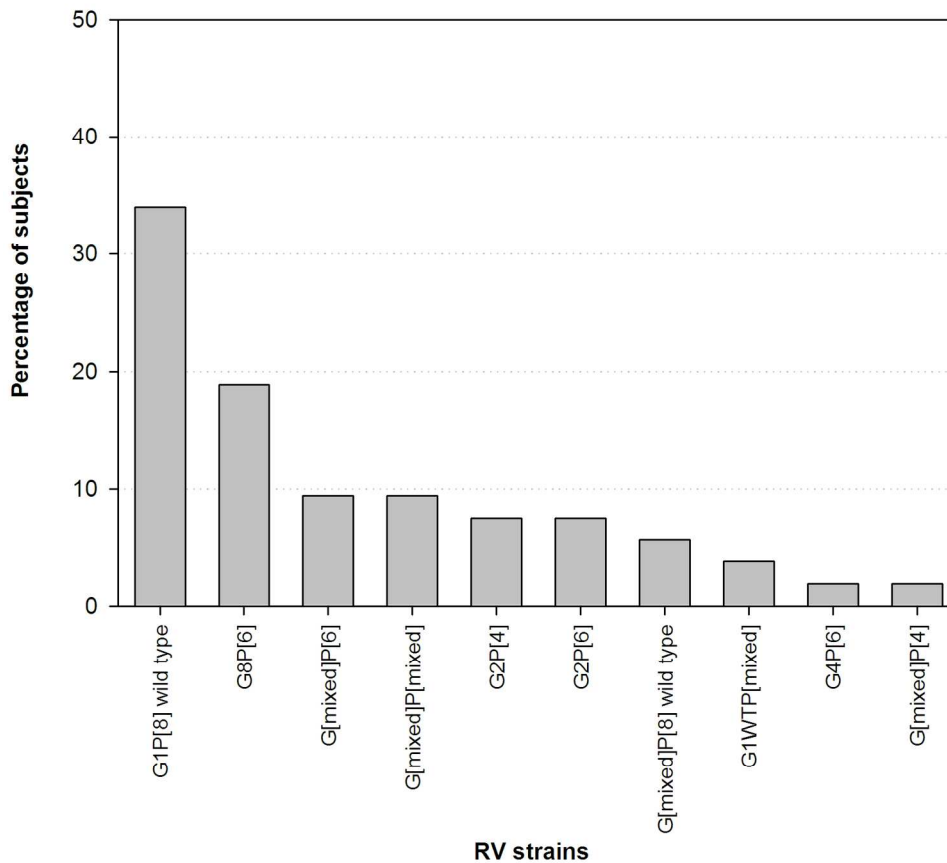

151x141mm (300 x 300 DPI)

only

1  
2  
3  
4  
5  
6  
7  
8  
9  
10  
11  
12  
13  
14  
15  
16  
17  
18  
19  
20  
21  
22  
23  
24  
25  
26  
27  
28  
29  
30  
31  
32  
33  
34  
35  
36  
37  
38  
39  
40  
41  
42  
43  
44  
45  
46  
47  
48  
49  
50  
51  
52  
53  
54  
55  
56  
57  
58  
59  
60

## STROBE Statement

<http://www.strobe-statement.org/index.php?id=available-checklists>

### Checklist of items that should be included in reports of observational studies

| Item                      |    | Recommendation                                                                                                                                                                                                                                                                                                                                                                                                                                                         | Page No |
|---------------------------|----|------------------------------------------------------------------------------------------------------------------------------------------------------------------------------------------------------------------------------------------------------------------------------------------------------------------------------------------------------------------------------------------------------------------------------------------------------------------------|---------|
|                           | No |                                                                                                                                                                                                                                                                                                                                                                                                                                                                        |         |
| <b>Title and abstract</b> | 1  | (a) Indicate the study's design with a commonly used term in the title or the abstract                                                                                                                                                                                                                                                                                                                                                                                 | 1       |
|                           |    | (b) Provide in the abstract an informative and balanced summary of what was done and what was found                                                                                                                                                                                                                                                                                                                                                                    | 3,4     |
| <b>Introduction</b>       |    |                                                                                                                                                                                                                                                                                                                                                                                                                                                                        |         |
| Background/<br>rationale  | 2  | Explain the scientific background and rationale for the investigation being reported                                                                                                                                                                                                                                                                                                                                                                                   | 7,8     |
| Objectives                | 3  | State specific objectives, including any prespecified hypotheses                                                                                                                                                                                                                                                                                                                                                                                                       | 8       |
| <b>Methods</b>            |    |                                                                                                                                                                                                                                                                                                                                                                                                                                                                        |         |
| Study design              | 4  | Present key elements of study design early in the paper                                                                                                                                                                                                                                                                                                                                                                                                                | 9       |
| Setting                   | 5  | Describe the setting, locations, and relevant dates, including periods of recruitment, exposure, follow-up, and data collection                                                                                                                                                                                                                                                                                                                                        | 9,10    |
| Participants              | 6  | (a) <i>Cohort study</i> —Give the eligibility criteria, and the sources and methods of selection of participants. Describe methods of follow-up<br><i>Case-control study</i> —Give the eligibility criteria, and the sources and methods of case ascertainment and control selection. Give the rationale for the choice of cases and controls<br><i>Cross-sectional study</i> —Give the eligibility criteria, and the sources and methods of selection of participants | 9       |
|                           |    | (b) <i>Cohort study</i> —For matched studies, give matching criteria and number of exposed and unexposed<br><i>Case-control study</i> —For matched studies, give matching criteria and the number of controls per case                                                                                                                                                                                                                                                 | NA      |
| Variables                 | 7  | Clearly define all outcomes, exposures, predictors, potential confounders, and effect modifiers. Give diagnostic criteria, if applicable                                                                                                                                                                                                                                                                                                                               | 9-11    |
| Data sources/             | 8* | For each variable of interest, give sources of data and                                                                                                                                                                                                                                                                                                                                                                                                                | 10,11   |

|                        |     |                                                                                                                                                                                                                                                                                                           |       |
|------------------------|-----|-----------------------------------------------------------------------------------------------------------------------------------------------------------------------------------------------------------------------------------------------------------------------------------------------------------|-------|
| measurement            |     | details of methods of assessment (measurement). Describe comparability of assessment methods if there is more than one group                                                                                                                                                                              |       |
| Bias                   | 9   | Describe any efforts to address potential sources of bias                                                                                                                                                                                                                                                 | NA    |
| Study size             | 10  | Explain how the study size was arrived at                                                                                                                                                                                                                                                                 | 9     |
| Quantitative variables | 11  | Explain how quantitative variables were handled in the analyses. If applicable, describe which groupings were chosen and why                                                                                                                                                                              | 11    |
| Statistical methods    | 12  | (a) Describe all statistical methods, including those used to control for confounding                                                                                                                                                                                                                     | 10,11 |
|                        |     | (b) Describe any methods used to examine subgroups and interactions                                                                                                                                                                                                                                       | 11    |
|                        |     | (c) Explain how missing data were addressed                                                                                                                                                                                                                                                               | NA    |
|                        |     | (d) <i>Cohort study</i> —If applicable, explain how loss to follow-up was addressed<br><i>Case-control study</i> —If applicable, explain how matching of cases and controls was addressed<br><i>Cross-sectional study</i> —If applicable, describe analytical methods taking account of sampling strategy | NA    |
|                        |     | (e) Describe any sensitivity analyses                                                                                                                                                                                                                                                                     | NA    |
| <b>Results</b>         |     |                                                                                                                                                                                                                                                                                                           |       |
| Participants           | 13* | (a) Report numbers of individuals at each stage of study—eg numbers potentially eligible, examined for eligibility, confirmed eligible, included in the study, completing follow-up, and analysed                                                                                                         | 12,13 |
|                        |     | (b) Give reasons for non-participation at each stage                                                                                                                                                                                                                                                      | 12,13 |
|                        |     | (c) Consider use of a flow diagram                                                                                                                                                                                                                                                                        | NA    |
| Descriptive data       | 14* | (a) Give characteristics of study participants (eg demographic, clinical, social) and information on exposures and potential confounders                                                                                                                                                                  | 12,13 |
|                        |     | (b) Indicate number of participants with missing data for each variable of interest                                                                                                                                                                                                                       | NA    |
|                        |     | (c) <i>Cohort study</i> —Summarise follow-up time (eg, average and total amount)                                                                                                                                                                                                                          | NA    |
| Outcome data           | 15* | <i>Cohort study</i> —Report numbers of outcome events or summary measures over time                                                                                                                                                                                                                       | NA    |
|                        |     | <i>Case-control study</i> —Report numbers in each exposure                                                                                                                                                                                                                                                | NA    |

|                          |    |                                                                                                                                                                                                              |       |
|--------------------------|----|--------------------------------------------------------------------------------------------------------------------------------------------------------------------------------------------------------------|-------|
|                          |    | category, or summary measures of exposure                                                                                                                                                                    |       |
|                          |    | <i>Cross-sectional study</i> —Report numbers of outcome events or summary measures                                                                                                                           | 12,13 |
| Main results             | 16 | (a) Give unadjusted estimates and, if applicable, confounder-adjusted estimates and their precision (eg, 95% confidence interval). Make clear which confounders were adjusted for and why they were included | 12-17 |
|                          |    | (b) Report category boundaries when continuous variables were categorized                                                                                                                                    | NA    |
|                          |    | (c) If relevant, consider translating estimates of relative risk into absolute risk for a meaningful time period                                                                                             | NA    |
| Other analyses           | 17 | Report other analyses done—eg analyses of subgroups and interactions, and sensitivity analyses                                                                                                               | 14-17 |
| <b>Discussion</b>        |    |                                                                                                                                                                                                              |       |
| Key results              | 18 | Summarise key results with reference to study objectives                                                                                                                                                     | 18    |
| Limitations              | 19 | Discuss limitations of the study, taking into account sources of potential bias or imprecision. Discuss both direction and magnitude of any potential bias                                                   | 21    |
| Interpretation           | 20 | Give a cautious overall interpretation of results considering objectives, limitations, multiplicity of analyses, results from similar studies, and other relevant evidence                                   | 18-21 |
| Generalisability         | 21 | Discuss the generalisability (external validity) of the study results                                                                                                                                        | 20    |
| <b>Other information</b> |    |                                                                                                                                                                                                              |       |
| Funding                  | 22 | Give the source of funding and the role of the funders for the present study and, if applicable, for the original study on which the present article is based                                                | 24    |

\*Give information separately for cases and controls in case-control studies and, if applicable, for exposed and unexposed groups in cohort and cross-sectional studies.

**Note:** An Explanation and Elaboration article discusses each checklist item and gives methodological background and published examples of transparent reporting. The STROBE checklist is best used in conjunction with this article (freely available on the Web sites of PLoS Medicine at <http://www.plosmedicine.org/>, Annals of Internal Medicine at <http://www.annals.org/>, and Epidemiology at <http://www.epidem.com/>).

1  
2  
3 Information on the STROBE Initiative is available at [www.strobe-statement.org](http://www.strobe-statement.org).  
4  
5  
6  
7  
8  
9  
10  
11  
12  
13  
14  
15  
16  
17  
18  
19  
20  
21  
22  
23  
24  
25  
26  
27  
28  
29  
30  
31  
32  
33  
34  
35  
36  
37  
38  
39  
40  
41  
42  
43  
44  
45  
46  
47  
48  
49  
50  
51  
52  
53  
54  
55  
56  
57  
58  
59  
60

For peer review only



**Hospital-based surveillance of rotavirus gastroenteritis among children under five years of age in the Republic of Ivory Coast: A cross-sectional study**

|                                 |                                                                                                                                                                                                                                                                                                                                                                         |
|---------------------------------|-------------------------------------------------------------------------------------------------------------------------------------------------------------------------------------------------------------------------------------------------------------------------------------------------------------------------------------------------------------------------|
| Journal:                        | <i>BMJ Open</i>                                                                                                                                                                                                                                                                                                                                                         |
| Manuscript ID:                  | bmjopen-2013-003269.R1                                                                                                                                                                                                                                                                                                                                                  |
| Article Type:                   | Research                                                                                                                                                                                                                                                                                                                                                                |
| Date Submitted by the Author:   | 30-Jul-2013                                                                                                                                                                                                                                                                                                                                                             |
| Complete List of Authors:       | AKOUA KOFFI, Chantal; Pasteur Institute of Cote d'Ivoire, Department of Epidemic Viruses; Bouake Medical School, Department of Biology ASSE, Vincent; Northern Abobo Hospital, Medical Pediatrics Department Jean Jacques, Yao Atteby; Pediatrics Department of the University Teaching Hospital of Treichville/ Medical Sciences Training and Research Unit of Abidjan |
| <b>Primary Subject Heading</b>: | Epidemiology                                                                                                                                                                                                                                                                                                                                                            |
| Secondary Subject Heading:      | Gastroenterology and hepatology                                                                                                                                                                                                                                                                                                                                         |
| Keywords:                       | VIROLOGY, Gastrointestinal infections < GASTROENTEROLOGY, INFECTIOUS DISEASES                                                                                                                                                                                                                                                                                           |
|                                 |                                                                                                                                                                                                                                                                                                                                                                         |

SCHOLARONE™  
Manuscripts



EPI-RV-Ivory Coast  
Journal resubmission BMJ Open

## Original Research

**Title:** Hospital-based surveillance of rotavirus gastroenteritis among children under five years of age in the Republic of Ivory Coast: A cross-sectional study

**Authorship:** Akoua-Koffi Chantal,<sup>1</sup> Asse Kouadio Vincent,<sup>2</sup> Yao Atteby Jean Jacques<sup>3</sup>

### Affiliations:

<sup>1</sup>Pasteur Institute of Ivory Coast/ Medical sciences Training and Research Unit of Bouake, Ivory Coast

<sup>2</sup>Northern Abobo Hospital Medical Pediatrics Department, Ivory Coast

<sup>3</sup>Pediatrics Department of the University Teaching Hospital of Treichville/ Medical Sciences Training and Research Unit of Abidjan, Ivory Coast

**Correspondence to:** Akoua-Koffi Chantal

**Address:** Pasteur Institute of Ivory Coast/Medical sciences Training and Research Unit of Bouake (Bouake Medical School)

P box: 490 Abidjan 01, Republic of Ivory Coast

**Tel:** +225 07 98 47 57/ +225 02 03 63 47

**Email:** [akouamc@yahoo.fr](mailto:akouamc@yahoo.fr)

**Keywords:** Ivory Coast, disease burden, rotavirus, gastroenteritis

**Word count: Abstract:** 289/300; **Manuscript:** 3159/4000

EPI-RV-Ivory Coast  
Journal resubmission BMJ Open

**Abbreviations:**

AGE: acute gastroenteritis; CI: confidence interval; ER: emergency room; GE: gastroenteritis; GSK: GlaxoSmithKline; IV: intravenous; RT-PCR: reverse transcriptase polymerase chain reaction; RV: rotavirus; WAZ: weight-for-age Z-scores.

For peer review only

EPI-RV-Ivory Coast  
Journal resubmission BMJ Open

## ABSTRACT

**Objectives:** To estimate the proportion of rotavirus gastroenteritis (RVGE) among children aged less than five years who had been diagnosed with acute gastroenteritis (AGE) and admitted to hospitals and emergency rooms (ERs). The seasonal distribution of RVGE and most prevalent RV strains were also assessed.

**Design:** A cross-sectional hospital-based surveillance study.

**Setting:** Five reference pediatric hospitals across Abidjan.

**Participants:** Children aged less than five years, who were hospitalized/ visiting ERs for WHO-defined AGE were enrolled. Written informed consent was obtained from parents/ guardians before enrollment. Children who acquired nosocomial infection were excluded from the study.

**Primary and secondary outcome measures:** The proportion of RVGE among AGE hospitalizations and ER visits were expressed with 95% exact confidence interval (CI). Stool samples were collected from all enrolled children and were tested for the presence of RV using an enzyme immunoassay. RV positive samples were serotyped using reverse transcriptase polymerase chain reaction.

**Results:** Of 357 enrolled children (mean age  $13.6 \pm 11.14$  months), 332 were included in the final analyses; 56.3% (187/332) were hospitalized and 43.7% (145/332) were admitted to ERs. The proportion of RVGE hospitalizations and ER visits among all AGE cases was 30.1% (95% CI: 23.6-37.3) and 26.9% (95% CI: 19.9-34.9), respectively. Ninety-five children (28.6%) were RV positive; the highest

EPI-RV-Ivory Coast  
Journal resubmission BMJ Open

1  
2  
3  
4 number of RVGE cases was observed in children aged 6-11 months. The number  
5  
6 of GE cases peaked in July and August 2008; the highest percentage of RV  
7  
8 positive cases was observed in January 2008. G1P[8]wild-type and G8P[6] were  
9  
10 the most commonly detected strains.  
11  
12

13  
14 **Conclusion:** RVGE causes substantial morbidity among children under five years  
15  
16 of age and remains a health concern in the Republic of Ivory Coast, where  
17  
18 implementation of prevention strategies such as vaccination might help to reduce  
19  
20 disease burden.  
21  
22  
23  
24  
25  
26  
27  
28  
29  
30  
31  
32  
33  
34  
35  
36  
37  
38  
39  
40  
41  
42  
43  
44  
45  
46  
47  
48  
49  
50  
51  
52  
53  
54  
55  
56  
57  
58  
59  
60

## ARTICLE SUMMARY

### Article focus

- The burden of rotavirus gastroenteritis (RVGE) in the Republic of Ivory Coast is substantial and recent epidemiological data are limited.
- The main focus of this study was to estimate the proportion of RV among young children hospitalized or treated at emergency rooms (ER) for acute gastroenteritis (AGE).
- We also investigated the seasonal distribution of RVGE and the prevalent RV types in the study population.

### Key messages

- RVGE accounts for about 28.6% of AGE hospitalizations and 30.1% ER visits in the Republic of Ivory Coast and particularly affects children younger than 24 months of age.
- The number of RVGE cases peaked during July and August 2008. The most prevalent RV strains were G1P[8] wild-type and G8P[6].
- Implementation of preventative measure such as RV vaccination could help to reduce the burden of RVGE in the Republic of Ivory Coast.

### Strengths and limitations of this study:

- Our study was conducted in large city-based pediatric hospitals and our findings are therefore likely to be representative of the whole population.
- Our systematic approach for enrolment allowed the easy identification of AGE cases.
- Our study enrolled only a proportion of all reported AGE cases and only severe cases were included.

## INTRODUCTION

Wild-type, rotavirus (RV) causes approximately 111 million gastroenteritis (GE) episodes, 25 million clinic visits, two million hospitalizations and over 453,000 deaths each year among children younger than five years of age.[1, 2] It has been reported that RV mortality is highest among the low income countries of Asia, Africa and Latin America.[3] A systematic review and meta-analysis of published studies in 2009 found that the overall mortality rate associated with RV infection in children under five years of age in sub-Saharan Africa was 243.3 deaths per 100,000 children (95% CI 187.6–301.7).[4] Globally, RV infection rates are also highest among younger children, with approximately 95% children experiencing at least one episode of RVGE by the time they reach five years of age.[5]

RVGE is characterized by fever, diarrhea and vomiting, leading to severe dehydration and increased hospitalization. Over 90% of children with RVGE suffer from dehydration-associated mortality due to diarrhea and associated vomiting.[6-8] It has been suggested that RV infections are more common during the cooler months of the year and that RVGE disease burden is similar in both high and low income nations.[1] However, due to malnutrition and lack of access to appropriate treatment facilities, it is the children from the low-income countries who die more frequently.[1]

As improvements in hygiene and sanitation have not been accompanied by reductions in the incidence of RV-associated diseases,[9] vaccination against RV is therefore considered as a public health priority for low income nations.[10] The

EPI-RV-Ivory Coast  
Journal resubmission BMJ Open

1  
2  
3  
4 introduction of RV vaccination could have significant benefits for children aged less  
5  
6 than three years, and might help to reduce diarrhea-associated childhood morbidity  
7  
8 and mortality in low income countries and RV-related hospitalization in high income  
9  
10 countries.[11, 12]  
11  
12

13  
14 The most common globally circulating RV serotypes associated with RVGE are  
15  
16 G1, G2, G3 and G4.[13] In addition, G9 has emerged over the past decade as a  
17  
18 globally important serotype.[14] Together, these serotypes are responsible for 95%  
19  
20 of worldwide pediatric RVGE cases.[15]  
21  
22

23  
24 The epidemiology of RV infection has been followed in several small studies  
25  
26 conducted in Abidjan in the Republic of Ivory Coast,[16–21] but recent data for this  
27  
28 region are limited. Nevertheless, data on RVGE disease, the number of  
29  
30 hospitalizations and the number of emergency room (ER) visits following acute GE  
31  
32 (AGE) are critical to formulate effective policies to control RV-related AGE and are  
33  
34 important to fully determine the need for RV vaccines and the possible impact of  
35  
36 their introduction.  
37  
38  
39

40  
41 This study was designed to estimate the proportion of RVGE among children  
42  
43 younger than five years of age who were diagnosed with AGE and admitted to  
44  
45 hospitals and ERs in the Republic of Ivory Coast. The seasonal distribution of  
46  
47 RVGE and the prevalent RV types were also studied.  
48  
49  
50  
51  
52  
53  
54  
55  
56  
57  
58  
59  
60



EPI-RV-Ivory Coast  
Journal resubmission BMJ Open

## METHODS

### Study design

This cross-sectional hospital-based surveillance study was conducted across five reference pediatric hospitals in Abidjan, the Republic of Ivory Coast between December 2007 and February 2009. The study was approved by the national Independent Ethics Committee (Ministère de la Santé et de l'Hygiène Publique, Abidjan) and conducted in accordance with Good Clinical Practice, Declaration of Helsinki (version 1996) and applicable local regulations. Written informed consent was obtained from parents/ guardians before children were enrolled.

Children presenting AGE were identified by checking hospital and ER logbooks. Male or female children aged less than five years, who were hospitalized or visited ER for AGE ( $\geq 3$  looser than normal stools per day with or without  $\geq 2$  episodes of vomiting within 24 hours) were included in the study. Children were excluded if they acquired AGE by possible nosocomial infection (within 12 hours after hospital admission).

Unique study numbers were assigned sequentially to all enrolled children in order to maintain their confidentiality. Parents/ guardians were interviewed and medical records were reviewed by the site staff to complete the study questionnaire and/ or case report form. Information including demography (date of birth, gender, height and weight, nutritional status, and area of residence); admission date and diagnosis at admission, date of discharge and administration of oral and/ or intravenous rehydration/ antibiotics were recorded and encoded in the study

EPI-RV-Ivory Coast  
Journal resubmission BMJ Open

1  
2  
3  
4 database. Details such as body temperature, duration of diarrhea or vomiting,  
5  
6 treatment and behavioral symptoms were also recorded. The severity of RVGE  
7  
8 was defined according to the Vesikari Scale (mild: score <7; moderate: score 7–10  
9  
10 and severe: score ≥11).[22]  
11  
12

13  
14 Stool samples collected within 4–10 days of the onset of GE from all enrolled  
15  
16 children as part of the study procedures were labeled, stored at a temperature of -  
17  
18 20°C to -70°C and then transported to the Pasteur Institute, Abidjan, within 72  
19  
20 hours of collection for testing. RV testing was performed using the IDEIA rotavirus  
21  
22 kit (DAKO Ltd., Cambridgeshire, UK) provided by the regional laboratory (Ivory  
23  
24 Coast National laboratory for rotavirus, affiliated to the World Health Organization  
25  
26 [WHO] regional reference laboratory located in Accra-Ghana [West Africa], at the  
27  
28 Noguchi Memorial Institute for Medical Research). A random subset of RV positive  
29  
30 stool samples were subsequently tested using reverse transcriptase-polymerase  
31  
32 chain reaction (RT-PCR) of the VP7 and VP4 genes followed by reverse  
33  
34 hybridization on a strip at the DDL Diagnostic Laboratory (Rijswijk, The  
35  
36 Netherlands) to identify G and P genotypes and to differentiate the presence of  
37  
38 wild-type G1 RV from the vaccine strain virus.[23] A visible pattern is observed on  
39  
40 the strip after hybridization which is specific to each genotype. As a  
41  
42 complementary tool, sequence analysis was performed to identify the genotypes  
43  
44 for samples that yielded an unclear pattern that could not be recognized. The  
45  
46 resulting sequence was analyzed by BLAST search against the GenBank database  
47  
48 to determine the RV genotype.[23]  
49  
50  
51  
52  
53  
54  
55  
56  
57  
58  
59  
60

EPI-RV-Ivory Coast  
Journal resubmission BMJ Open

## Analyses

All children meeting the pre-defined eligibility criteria were included in the final analyses.

The occurrence of severe dehydrating RVGE (based on the Vesikari scale [22]) administered treatment (including intravenous [IV] re-hydration), duration of hospitalization and outcome were all reported, together with the seasonal distribution of RVGE and the occurrence of RV types.

All statistical analyses were performed using Statistical Analysis System (SAS®) version 9.2 and the graphs were generated using Microsoft Excel®. Categorical data such as gender, seasonal distribution and disease severity were presented as proportions with one decimal. Burden of GE/ RVGE among hospitalizations/ ER visits were expressed as proportions with their 95% exact confidence interval (CI). Exploratory analyses of estimation of the crude odds ratio were performed using univariate logistic regression considering RV status as the outcome variable with clinical characteristics and discharge outcome as confounding factors. Multinomial univariate logistic regression was also explored to estimate the association between outcome at discharge as the dependent variable and RV status as the independent factors. Nutritional status was derived using the weight-for-age Z-scores (WAZ) based on the WHO child growth standards. Association between these derived nutritional status and the RV positivity were analyzed using the chi-square test with 95% exact CI. The 95% Walds CI was also estimated.

**RESULTS****Demographic characteristics**

A total of 1330 children (917 hospitalized and 413 visiting ER) presenting AGE were identified from hospital logs. Of these, 357 children were enrolled into the study. Informed consent was not collected for 973 children, due to: parent refusal; non-collection of samples; and failure of the surveillance to capture the cases. The mean age (standard deviation) of the enrolled children was 13.6 months ( $\pm$  11.14 months) (Table 1).

**Table 1: Demographic characteristics of enrolled children (N = 357)**

| Characteristics | Parameters      | Total                  |                | Emergency Room |      | Hospitalized |      |
|-----------------|-----------------|------------------------|----------------|----------------|------|--------------|------|
|                 |                 | (N <sup>a</sup> = 357) |                | (N = 161)      |      | (N = 196)    |      |
|                 |                 | n <sup>b</sup>         | % <sup>c</sup> | n              | %    | n            | %    |
|                 | N               | 357                    | -              | 161            | -    | 196          | -    |
| Age (Months)    | Mean            | 13.6                   | -              | 13.7           | -    | 13.5         | -    |
|                 | SD <sup>d</sup> | 11.14                  | -              | 11.39          | -    | 10.96        | -    |
|                 | Gender          | Female                 | 152            | 42.6           | 69   | 42.9         | 83   |
|                 | Male            | 205                    | 57.4           | 92             | 57.1 | 113          | 57.7 |

<sup>a</sup>Number of children<sup>b</sup>Number of children in a given category<sup>c</sup>n / N x 100<sup>d</sup>standard deviation

A total of 332 children were included in the final analysis; ; 25 were excluded due to not meeting the inclusion/ exclusion criteria (protocol violation) in two cases and

EPI-RV-Ivory Coast  
Journal resubmission BMJ Open

1  
2  
3  
4 failure to either collect or analyze the stool samples for RV in the remaining 23  
5  
6  
7 children.

8  
9  
10 Among those included in the final analysis, 56.3% (187/332) children had been  
11  
12 hospitalized and the remaining 43.7% (145/332) had visited an ER.

### 13 14 15 **Proportion of GE and RVGE hospitalizations**

16  
17  
18 The proportion of all AGE-related hospitalizations and ER visits that were  
19  
20 diagnosed with RVGE was 30.1% (n = 56; 95% CI: 23.6–37.3) and 26.9% (n = 39;  
21  
22 95% CI: 19.9–34.9), respectively.

23  
24  
25 Most of the children hospitalized and visiting the ER due to AGE corresponded to  
26  
27 children under two years of age (84.8% and 84.5%, respectively). The number of  
28  
29 RV positive and negative children stratified by age is shown in **Figure 1**. Ninety-five  
30  
31 children (28.6%) were RV positive, of whom over 80% were aged less than 24  
32  
33 months. The highest number of RVGE cases was seen in children aged 6–11  
34  
35 months (40.0% [38/95]) (**Figure 1**).

36  
37  
38 The seasonal distribution of RV-attributable GE hospitalization is shown in **Figure**  
39  
40 **2**. The number of GE cases was highest in July and August 2008 and the  
41  
42 percentage of RV positive cases was highest in January 2008.

### 43 44 45 **Clinical characteristics of GE and RVGE hospitalizations**

46  
47  
48 Among RV positive and negative children, severe GE (score  $\geq 11$  on the Vesikari  
49  
50 scale) was recorded in 64.2% (61/95) and 55.5% (131/236) children before  
51  
52 hospitalization, respectively (**Table 2**).

1  
2  
3  
4 The percentage of children recording GE-associated symptoms (diarrhea, vomiting  
5 and fever) was similar across RV positive and negative groups before  
6  
7 hospitalization. However, a significant (P-value = 0.0037) association between  
8  
9 vomiting and RV positive status was observed before hospital admission (Table  
10  
11  
12  
13  
14 2).

15  
16  
17 Nutritional status based on weight indicated that adequately and moderately  
18  
19 malnourished children were distributed similarly across both RV positive and  
20  
21 negative groups. However, a higher number of severely malnourished children was  
22  
23 observed in the RV negative group (Table 2).

24  
25  
26  
27 Oral rehydration was the most commonly used treatment for GE in both RV  
28  
29 positive and negative groups (70.5% and 75.8%, respectively), followed by  
30  
31 intravenous rehydration therapy (54.7% and 53.0%, respectively).

32  
33  
34 At discharge, the majority of children among both RV positive and negative groups  
35  
36 (71.6% [68/95] and 78.0% [184/236], respectively) had ongoing GE. Eight RV  
37  
38 negative children (3.4%) died, of whom all but one (87.5% [7/8]) were severely  
39  
40 malnourished. The unadjusted odds ratio estimate indicated that severely  
41  
42 malnourished children had 22.2 (95% CI: 2.5–198.8) times higher risk of dying as  
43  
44 compared to children with adequate nutritional status (P-value = 0.0056) (Table 2).

45  
46  
47  
48  
49 **Table 2: Clinical characteristics of children by RV status (N=331)**  
50  
51  
52  
53  
54  
55  
56  
57  
58  
59  
60

EPI-RV-Ivory Coast  
Journal resubmission BMJ Open

| Characteristic                                     | RV positive<br>(N <sup>a</sup> = 95)<br>n <sup>b</sup> (% <sup>c</sup> ) | RV negative<br>(N = 236)<br>n (%) | P-value  |
|----------------------------------------------------|--------------------------------------------------------------------------|-----------------------------------|----------|
| <b>Severity<sup>d</sup> before hospitalization</b> |                                                                          |                                   |          |
| Mild (<7)                                          | 6 (6.3)                                                                  | 27 (11.4)                         | 0.2300*  |
| Moderate (7–10)                                    | 28 (29.5)                                                                | 78 (33.1)                         |          |
| Severe (≥11)                                       | 61 (64.2)                                                                | 131 (55.5)                        |          |
| <b>Symptoms before hospitalization</b>             |                                                                          |                                   |          |
| Diarrhea                                           | 95 (100.0)                                                               | 235 (99.6)                        | 1.0000** |
| Vomiting                                           | 81 (85.3)                                                                | 170 (72.0)                        | 0.0037** |
| Fever                                              | 44 (46.3)                                                                | 116 (49.2)                        | 0.8557*  |
| <b>Classification of nutrition</b>                 |                                                                          |                                   |          |
| Overweight                                         | 5 (5.3)                                                                  | 8 (3.4)                           | 0.1981*  |
| Adequate (Normal)                                  | 66 (69.5)                                                                | 152 (64.4)                        |          |
| Moderately malnourished                            | 15 (15.8)                                                                | 32 (13.6)                         |          |
| Severely malnourished                              | 9 (9.5)                                                                  | 44 (18.6)                         |          |
| <b>Outcome at discharge</b>                        |                                                                          |                                   |          |
| Recovered                                          | 27 (28.4)                                                                | 40 (16.9)                         | 0.0145** |
| Ongoing GE                                         | 68 (71.6)                                                                | 184 (78.0)                        |          |
| Transferred                                        | 0 (0.0)                                                                  | 4 (1.7)                           |          |
| Died                                               | 0 (0.0)                                                                  | 8 (3.4)                           |          |

Note1: One child was excluded from analysis as RV status was not determined.

Note 2: Nutritional status were derived using the weight-for-age Z-scores (WAZ)

<sup>a</sup>Number of children

<sup>b</sup>Number of children in a given category

<sup>c</sup>n / N x 100

<sup>d</sup>Severity using the 20-point Vesikari scale

\*chi square P-value

\*\*Fisher Exact test P-value

## RV type distribution

Fifty three of 95 RV positive stool samples were assessed for RV type in this study.

The most prevalent RV types were G1P[8] wild-type (34.0% [18/53]) and G8P[6] (18.9% [10/53]). Mixed RV types were detected in 30.2% (16/53). The RV vaccine strain (G1P[8] vaccine strain) was not detected in any sample. The other detected RV types are shown in Figure 3.

For peer review only



## DISCUSSION

This study into RVGE disease burden found that RV infection is the primary cause of hospitalization due to GE in children aged less than five years in the Republic of Ivory Coast.

We identified RV in 30.1% and 26.9% children either hospitalized or visiting an ER for AGE, respectively. This is consistent with an earlier epidemiological study in Abidjan that demonstrated the general prevalence of RVGE in children younger than five years to be 27.9% between 1997 and 2000.[21] In addition, a review of published studies (1975 to 1992) of RVGE in Africa detected RV in 24–29% of children hospitalized for diarrhea.[9]

In the present study, RV disease burden was predominantly observed among young children (over 90.0% [87/95] were aged up to 23 months), which is consistent with previous studies conducted across the African continent.[9] A study conducted in Nigeria showed that over 90.0% of RVGE positive cases were observed in children aged less than two years [24] and two independent studies conducted in Egypt (1995–1996) [25] and Libya (October 2007–September 2008) [26] indicated that the incidence of RVGE was highest among children aged 6–11 months; all comparable to the results of the present study.

As observed in previous studies conducted in sub-Saharan Africa between 1975 and 1992,[9] most GE cases in this study were observed between July and August 2008.

EPI-RV-Ivory Coast  
Journal resubmission BMJ Open

1  
2  
3  
4 Almost all children who died following AGE in this study were severely  
5  
6 malnourished, indicating the importance of nutritional status in potentially  
7  
8 determining the outcome of AGE. Previous reports substantiate these findings  
9  
10 where malnourishment has been associated with a considerable risk of diarrhea-  
11  
12 associated mortality.[27, 28]  
13  
14

15  
16  
17 The circulation of mixed RV types in the African countries has been previously  
18  
19 reported.[29, 30] In this study, although wild-type G1P[8] was the most commonly  
20  
21 detected (34.0% [18/53]) RV type, several (30.2% [16/53]) mixed RV types were  
22  
23 detected. The proportion of mixed RV types observed in this study is comparable  
24  
25 to that reported by the WHO's RV surveillance in the African Region.[31] In this  
26  
27 report, nearly 42% of the circulating RV types during 2006–2009 comprised of  
28  
29 mixed RV types.[31]  
30  
31

32  
33  
34 There is no available anti-viral therapy for RV infection [32] and RVGE  
35  
36 management predominantly includes fluid and electrolyte replacement and  
37  
38 improvements in sanitation and water supply.[33] Antibiotic treatment is not  
39  
40 justified during RVGE and its use is limited to cases with documented bacterial co-  
41  
42 infection. However, it has been suggested that improvements in hygiene and  
43  
44 provision of safe water may not be as effective in the prevention of RVGE as they  
45  
46 are to GE due to other causes.[33]  
47  
48

49  
50  
51 Previous studies have established that RV vaccination confers protection against  
52  
53 severe RVGE and has helped relieve the global burden of this disease.[34–37]  
54  
55 These effects have been observed in similar settings in Asia, Africa and Latin  
56  
57  
58  
59  
60

EPI-RV-Ivory Coast  
Journal resubmission BMJ Open

1  
2  
3  
4 America.[29, 38, 39] The efficacy of RV vaccines against severe RVGE has been  
5  
6 found to be 59% in South Africa and Malawi [40] and 64% in Kenya, Ghana and  
7  
8 Mali.[41] RV vaccination may therefore represent the most effective primary public  
9  
10 health intervention against RVGE. Indeed in 2009, the WHO recommended the  
11  
12 inclusion of RV vaccines in the routine childhood vaccine programs of all  
13  
14 countries.[42] RV vaccines are available in the private sector in the Republic of  
15  
16 Ivory Coast, but no RV vaccine is currently included in the universal mass  
17  
18 vaccination program.  
19  
20  
21  
22  
23

24 Data presented in this study highlight the magnitude of RV-associated disease  
25  
26 burden and might allow policy makers to determine the need to implement of  
27  
28 prevention strategies in the Republic of Ivory Coast. Indeed, the inclusion of a RV  
29  
30 vaccine, as a prevention strategy, might help to reduce the burden of AGE and  
31  
32 AGE-associated hospitalizations.  
33  
34  
35

36 The results of this study need to be interpreted in the light of several strengths and  
37  
38 limitations. Among the strengths, the systematic approach followed in this study to  
39  
40 identify children by checking hospital and ER logbooks enabled easy identification  
41  
42 of AGE cases using standard case definitions. Secondly, the study was conducted  
43  
44 in reference hospitals seeing over 1,300 AGE cases annually, which complies with  
45  
46 the recommendations of WHO's generic protocol for hospital-based of RVGE in  
47  
48 children [43]. By including multiple centers, these data more closely represent the  
49  
50 local population. In addition, the quality check processes performed on the  
51  
52 laboratory tests of RV positive samples provides credibility to the results.  
53  
54  
55  
56  
57  
58  
59  
60

EPI-RV-Ivory Coast  
Journal resubmission BMJ Open

1  
2  
3  
4 However, the study does have limitations. As a large number of children who  
5  
6 presented with GE were not enrolled and tested for RV, the possibility of selection  
7  
8 bias might be considered. Our reported prevalence of RVGE might have been  
9  
10 affected by selecting only severe GE cases with more severe disease  
11  
12 characteristics, including longer hospital stays. Nonetheless, this study provides a  
13  
14 realistic picture of the role of RV among more severe cases of RVGE, which incur  
15  
16 substantial direct and indirect medical costs and impact public health in this setting.  
17  
18 It should be noted that most of the subjects who were not enrolled were either not  
19  
20 captured during surveillance or did not consent to participate in the study.  
21  
22 Secondly, only 53 out of 95 RV positive stool samples were available for strain  
23  
24 identification which limits the possibility of describing the circulating strains.  
25  
26 Nevertheless, by using a reference laboratory with validated techniques and  
27  
28 experience for PCR confirmation, it was possible to provide accurate estimates for  
29  
30 the identified strains. Lastly, firm conclusions regarding the seasonality of RV and  
31  
32 the variation in circulating RV strains could not be drawn as the surveillance  
33  
34 activities were conducted for just one year following recommendations from  
35  
36 WHO.[43] Nevertheless, routine surveillance is warranted as rotavirus circulation  
37  
38 might vary from one calendar year to another.  
39  
40  
41  
42  
43  
44  
45  
46  
47  
48  
49  
50  
51  
52  
53  
54  
55  
56  
57  
58  
59  
60

EPI-RV-Ivory Coast  
Journal resubmission BMJ Open

## CONCLUSION

RVGE in children aged less than five years continues to be a major public health challenge in the Republic of Ivory Coast. In our study, the disease, which peaked in July and August, mainly affected infants aged 6–11 months. Wild-type G1P[8] and G8P[6] were the most frequently reported RV types. The inclusion of a RV vaccine into local preventative programs might therefore help to reduce the disease burden of RVGE.

## Acknowledgements

The authors would like to thank Véronique Agbaya-Akran Awo and Mariam Drame for their contribution to the study conduct at the site; Vrushali Sanghrajka for statistical inputs. The authors also thank Dr. Lamine Soumahoro (head of Medical Department) and Dr. Marie-José Anguibi-Pokou (both employed by GlaxoSmithKline group of companies) for their involvement in monitoring of the study sites, ensuring the supply of study material and conducting trainings on Good Clinical practices. The authors acknowledge the contributions of Dominique Luyts and Karin Hallez for providing logistical support as clinical operation managers; and Rodrigo DeAntonio for intellectual inputs and review of the manuscript (all employed by GlaxoSmithKline group of companies); Dr. Ekaza Euloge from Pasteur Institute of Ivory Coast for his assistance in molecular testing in Abidjan; Dr. Berah and Dr. Niamen for sample collection; DDL Diagnostic Laboratory (The Netherlands) for performing RT-PCR and nested PCR to determine rotavirus G and P types. The authors would also like to thank Harshith Bhat (employed by GlaxoSmithKline group of companies) for medical writing, Abdelilah Ibrahim (XPE Pharma and Science for GlaxoSmithKline group of companies) and Valentine Wascotte for Publication coordination (all employed by GlaxoSmithKline group of companies) and Julia Donnelly for copy-editing (freelance on behalf of GlaxoSmithKline group of companies).

## Contributors

EPI-RV-Ivory Coast  
Journal resubmission BMJ Open

1  
2  
3  
4 AKC was the principal investigator and contributed to the conception, design,  
5  
6 analysis and interpretation of the study. AKV and YAJ coordinated the study  
7  
8 together with AKC and contributed to the interpretation of the results. All authors  
9  
10 participated in the development of this manuscript.  
11  
12

### 13 14 **Funding**

15  
16  
17 GlaxoSmithKline Biologicals SA was the funding source and was involved in all  
18  
19 stages of the study conduct and analysis. GlaxoSmithKline Biologicals SA also  
20  
21 took in charge all costs associated with the development and the publishing of the  
22  
23 present manuscript.  
24  
25

### 26 27 **Competing interests**

28  
29 All the authors have no competing interest to declare.  
30  
31

### 32 33 **Trademark**

34  
35  
36 DAKO RV EIA is a trademark of DAKO Ltd., Cambridgeshire, UK.  
37  
38  
39  
40  
41  
42  
43  
44  
45  
46  
47  
48  
49  
50  
51  
52  
53  
54  
55  
56  
57  
58  
59  
60

## REFERENCES

1. Parashar UD, Hummelman EG, Bresee JS, *et al.* Global illness and deaths caused by rotavirus disease in children. *Emerg Infect Dis* 2003;**9**:565–71.
2. Tate JE, Burton AH, Boschi-Pinto C, *et al.* WHO-coordinated Global Rotavirus Surveillance Network. 2008 estimate of worldwide rotavirus-associated mortality in children younger than 5 years before the introduction of universal rotavirus vaccination programmes: a systematic review and meta-analysis. *Lancet Infect Dis* 2012;**12**(2):136–41
3. Parashar UD, Burton A, Lanata C, *et al.* Global mortality associated with rotavirus disease among children in 2004. *J Infect Dis* 2009;**200**:S9–15.
4. Sanchez-Padilla E, Grais RF, Guerin PJ, *et al.* Burden of disease and circulating serotypes of rotavirus infection in sub-Saharan Africa: systematic review and meta-analysis. *Lancet Infect Dis* 2009;**9**(9):567–76.
5. Parashar UD, Bresee JS, Gentsch JR, *et al.* Rotavirus. *Emerg Infect Dis* 1998;**4**:561–70.
6. Glass RI, Kilgore PE, Holman RC, *et al.* The epidemiology of rotavirus diarrhea in the United States: surveillance and estimates of disease burden. *J Infect Dis* 1996;**174**:S5–11.
7. Gurwith M, Wenman W, Gurwith D, *et al.* Diarrhea among infants and young children in Canada: a longitudinal study in three northern communities. *J Infect Dis* 1983;**147**:685–92.



EPI-RV-Ivory Coast  
Journal resubmission BMJ Open

- 1  
2  
3  
4  
5  
6  
7  
8  
9  
10  
11  
12  
13  
14  
15  
16  
17  
18  
19  
20  
21  
22  
23  
24  
25  
26  
27  
28  
29  
30  
31  
32  
33  
34  
35  
36  
37  
38  
39  
40  
41  
42  
43  
44  
45  
46  
47  
48  
49  
50  
51  
52  
53  
54  
55  
56  
57  
58  
59  
60
8. Rodriguez WJ, Kim HW, Brandt CD, *et al.* Longitudinal study of rotavirus infection and gastroenteritis in families served by a pediatric medical practice: clinical and epidemiologic observations. *Pediatr Infect Dis J* 1987;**6**:170–6.
9. Cunliffe NA, Kilgore PE, Bresee JS, *et al.* Epidemiology of rotavirus diarrhea in Africa: a review to assess the need for rotavirus immunization. *Bull WHO* 1998;**76**:525–37.
10. Naficy AB, Abu-Elyazeed R, Holmes JL, *et al.* Epidemiology of rotavirus diarrhea in Egyptian children and implications for disease control. *Am J Epidemiol* 1999;**150**:770–6.
11. Cunliffe NA, Nakagomi O. A critical time for rotavirus vaccines: a review. *Exp Rev Vac* 2005;**4**:521–32.
12. Glass RI, Bresse JS, Turcios R, *et al.* Rotavirus vaccines: Targeting the developing world. *J Infect Dis* 2005;**192**:S160–6.
13. Steele AD, Ivanoff B. Rotavirus strains circulating in Africa during 1996–1999: emergence of G9 strains and P[6] strains. *Vaccine* 2003;**21**:361–7.
14. Yang J, Wang T, Wang Y, *et al.* Emergence of human rotavirus group A genotype G9 strains, Wuhan, China. *Emerg Infect Dis* 2007;**13**:1587–9.
15. Atkinson W, Hamborsky J, McIntyre L, *et al.* Epidemiology and Prevention of Vaccine-Preventable Diseases. Washington, DC: Public Health Foundation; 2008.

EPI-RV-Ivory Coast  
Journal resubmission BMJ Open

16. Cowpli-Bony M, Loukou YG, Teby A, *et al.* Technique immunoenzymatique epidemiologie des diarrhees aiguës a rotavirus chez 115 enfants diarrheiques atteints de malnutrition a Abidjan. *Rev Med Côte d'Ivoire* 1987;**79**:21–5.
17. Lougou YG, Selly E. Sous-groupes de rotavirus humains en Côte d'Ivoire determines par immunoenzymologie. *Rev Med Côte d'Ivoire* 1987;**81**:4–9.
18. Akoua-Koffi C, Faye-Kette H, Kouakou K, *et al.* Interet de l'utilisation d'un test au latex (Rotalex) pour le depistage de rotavirus dans les selles diarrheiques a Abidjan. *Med Afr Noire* 1993;**40**:599–602.
19. Akran VA, Akoua-Koffi C, Hette K, *et al.* Electrophoretotypes of rotavirus in children 15 years of age in Abidjan, Côte d'Ivoire in 1997. *Afr J Health Sci* 2001;**8**:33–8.
20. Niangue-Beugre NN, Couitchere L, Oulai SM, *et al.* Aspect epidemiologiques, cliniques et etiologiques des diarrhees aiguës des enfants ages de 1 mois a 5 ans recus dans le service de pediatrie du CHU de Treichville (Côte d'Ivoire). *Arch de Pediatrie* 2006;**13**:395–8.
21. Akoua-Koffi C, Akran V, Peenze I, *et al.* Epidemiological and virological aspects rotavirus diarrhea in Abidjan, Côte d'Ivoire (1997–2000). *Bull Soc Pathol Exot* 2007;**100**:246–9.
22. Ruuska T, Vesikari T. Rotavirus disease in Finnish children: Use of numerical scores for clinical severity of diarrheal episodes. *Scand J Infect Dis* 1990;**22**:259–67.

EPI-RV-Ivory Coast  
Journal resubmission BMJ Open

- 1  
2  
3  
4 23. van Doorn LJ, Kleter B, Hoefnagel E, *et al.* Detection and genotyping of human  
5  
6 rotavirus VP4 and VP7 genes by reverse transcriptase PCR and reverse  
7  
8 hybridization. *J Clin Microbiol* 2009;**47**:2704–12.  
9  
10  
11  
12 24. Junaid SA, Umeh C, Olabode AO, *et al.* Incidence of rotavirus infection in  
13  
14 children with gastroenteritis attending Jos university teaching hospital, Nigeria.  
15  
16 *Viol J* 2011;**8**:233.  
17  
18  
19  
20 25. Khoury H, Ogilvie I, El Khoury AC, *et al.* Burden of rotavirus gastroenteritis in  
21  
22 the Middle Eastern and North African pediatric population. *BMC Infect Dis*  
23  
24 2011;**11**:9.  
25  
26  
27  
28 26. Abugalia M, Cuevas L, Kirby A, *et al.* Clinical features and molecular  
29  
30 epidemiology of rotavirus and norovirus infections in Libyan children. *J Med*  
31  
32 *Viol* 2011;**83**:1849–56.  
33  
34  
35 27. Ochoa TJ, Salazar-Lindo E, Cleary TG. Management of children with infection-  
36  
37 associated persistent diarrhea. *Semin Pediatr Infect Dis* 2004;**15**:229–36.  
38  
39  
40 28. Uysal G, Sökmen A, Vidinlisan S. Clinical risk factors for fatal diarrhea in  
41  
42 hospitalized children. *Indian J Pediatr* 2000;**67**:329–33.  
43  
44  
45 29. Armah GE, Steele AD, Esona MD, *et al.* Diversity of rotavirus strains circulating  
46  
47 in West Africa from 1996 to 2000. *J Infect Dis* 2010;**202**(S1):S64–71.  
48  
49  
50 30. Todd S, Page NA, Steele DA, *et al.* Rotavirus strain types circulating in Africa:  
51  
52 Review of Studies Published during 1997–2006. *J Infect Dis* 2010;**202**:S34–42.  
53  
54  
55  
56  
57  
58  
59  
60

- 1  
2  
3  
4  
5  
6  
7  
8  
9  
10  
11  
12  
13  
14  
15  
16  
17  
18  
19  
20  
21  
22  
23  
24  
25  
26  
27  
28  
29  
30  
31  
32  
33  
34  
35  
36  
37  
38  
39  
40  
41  
42  
43  
44  
45  
46  
47  
48  
49  
50  
51  
52  
53  
54  
55  
56  
57  
58  
59  
60
31. World Health Organization. Rotavirus surveillance in the African Region. Updates of Rotavirus surveillance in the African Region. [http://www.afro.who.int/index.php?option=com\\_content&view=article&id=2486:rotavirus-surveillance-in-the-african-region&catid=1980&Itemid=2737](http://www.afro.who.int/index.php?option=com_content&view=article&id=2486:rotavirus-surveillance-in-the-african-region&catid=1980&Itemid=2737) (accessed 26 July 2013).
32. Dennehy PH. Transmission of rotavirus and other enteric pathogens in the home. *Pediatr Infect Dis J* 2000;**19**:S103–5.
33. Parashar UD, Gibson CJ, Bresse JS, *et al*. Rotavirus and severe childhood diarrhea. *Emerg Infect Dis* 2006;**12**:304–6.
34. Paulke-Korienk M, Rendi-Wagner P, Kundi M, *et al*. Universal mass vaccination against rotavirus gastroenteritis: impact on hospitalization rates in Austrian children. *Pediatr Infect Dis J* 2010;**29**:319–23.
35. Richardson V, Hernandez-Pichardo J, Quintanar-Solares M, *et al*. Reduction in childhood diarrhea deaths after rotavirus vaccine introduction in Mexico. *N Engl J Med* 2010;**362**:299–305.
36. Yen C, Tate JE, Patel MM, *et al*. Rotavirus vaccines: update on global impact and future priorities. *Hum Vaccin* 2011;**7**:1282–90.
37. Centers for Disease Control. Rotavirus surveillance—worldwide, 2001–2008. *MMWR Morb Mortal Wkly Rep* 2008;**57**:1255–7.

EPI-RV-Ivory Coast  
Journal resubmission BMJ Open

- 1  
2  
3  
4  
5  
6  
7  
8  
9  
10  
11  
12  
13  
14  
15  
16  
17  
18  
19  
20  
21  
22  
23  
24  
25  
26  
27  
28  
29  
30  
31  
32  
33  
34  
35  
36  
37  
38  
39  
40  
41  
42  
43  
44  
45  
46  
47  
48  
49  
50  
51  
52  
53  
54  
55  
56  
57  
58  
59  
60
38. Ruiz-Palacios GM, Pérez-Schael I, Velázquez FR, *et al.* Safety and efficacy of an attenuated vaccine against severe rotavirus gastroenteritis. *New Engl J Med* 2006;**354**:11–22.
39. Linhares AC, Velázquez FR, Pérez-Schael I, *et al.* Efficacy and safety of an oral live attenuated human rotavirus vaccine against rotavirus gastroenteritis during the first 2 years of life in Latin American infants: randomized, double-blind controlled study. *Lancet* 2008;**371**:1181–99.
40. Madhi SA, Cunliffe NA, Steele D, *et al.* Effect of human rotavirus vaccine on severe diarrhea in African infants. *N Engl J Med* 2010;**362**:289–98.
41. Armah GE, Sow SO, Breiman RF, *et al.* Efficacy of pentavalent rotavirus vaccine against severe rotavirus gastroenteritis in infants in developing countries in sub-Saharan Africa: a randomized, double-blind, placebo-controlled trial. *Lancet* 2010;**376**:606–14.
42. Meeting of the Strategic Advisory Group of Experts on immunization, October 2009 – conclusions and recommendations. *Wkly Epidemiol Rec* 2009;**84**:517–32.
43. World Health Organization. Generic protocols for (i) hospital-based surveillance to estimate the burden of rotavirus gastroenteritis in children and (ii) a community-based survey on utilization of health care services for gastroenteritis in children. *Vaccine Assessment and Monitoring team of the Department of Vaccines and Biologicals*. 2002, Vol. WHO/V&B/02.15.

**Figure 1: Distribution of GE cases by RV status by age groups (N = 332)**

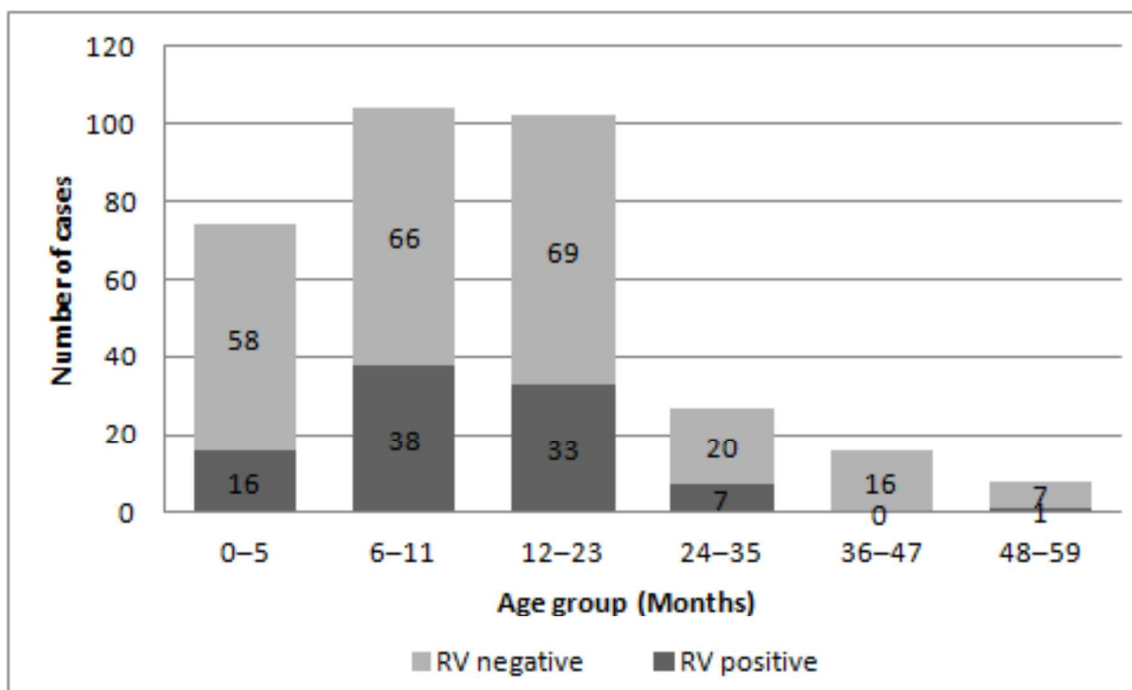

Note: RV status of one subject in the age group 0–5 Months was unknown

CONFIDENTIAL  
Review only

EPI-RV-Ivory Coast  
Journal resubmission BMJ Open

Figure 2: Seasonality of acute GE and RVGE hospitalizations (N=331)

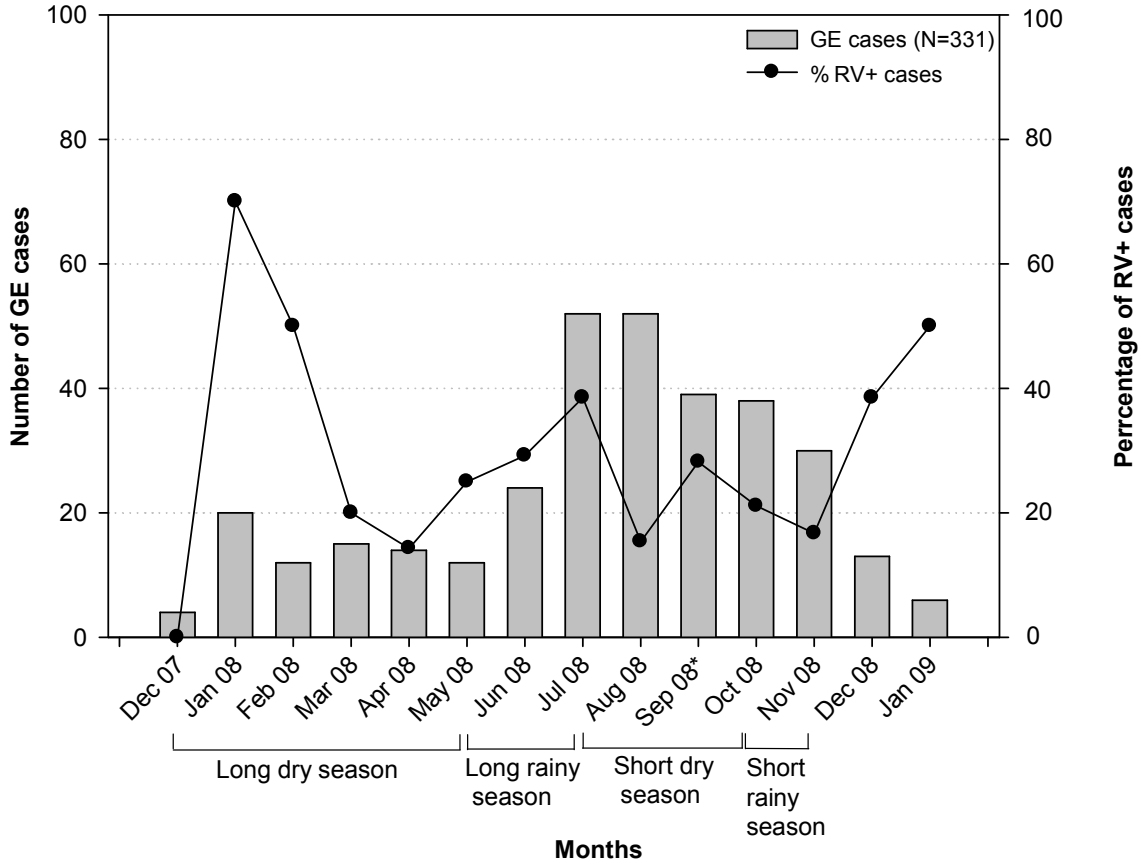

COMING ONLY

EPI-RV-Ivory Coast  
Journal resubmission BMJ Open

Figure 3: Distribution of RV G and P types (N=331)

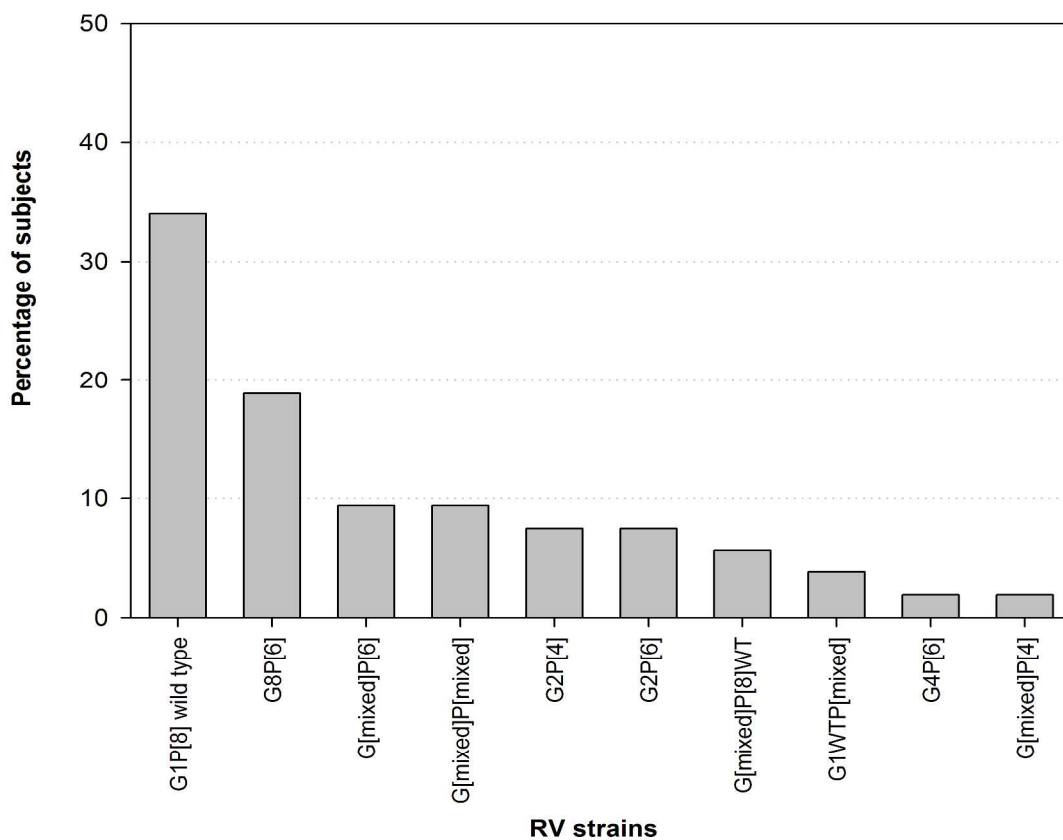

CONFIDENTIAL  
Review only

1  
2  
3  
4  
5  
6  
7  
8  
9  
10  
11  
12  
13  
14  
15  
16  
17  
18  
19  
20  
21  
22  
23  
24  
25  
26  
27  
28  
29  
30  
31  
32  
33  
34  
35  
36  
37  
38  
39  
40  
41  
42  
43  
44  
45  
46  
47  
48  
49  
50  
51  
52  
53  
54  
55  
56  
57  
58  
59  
60



1  
2  
3  
4  
5  
6  
7  
8  
9  
10  
11  
12  
13  
14  
15  
16  
17  
18  
19  
20  
21  
22  
23  
24  
25  
26  
27  
28  
29  
30  
31  
32  
33  
34  
35  
36  
37  
38  
39  
40  
41  
42  
43  
44  
45  
46  
47  
48  
49  
50  
51  
52  
53  
54  
55  
56  
57  
58  
59  
60

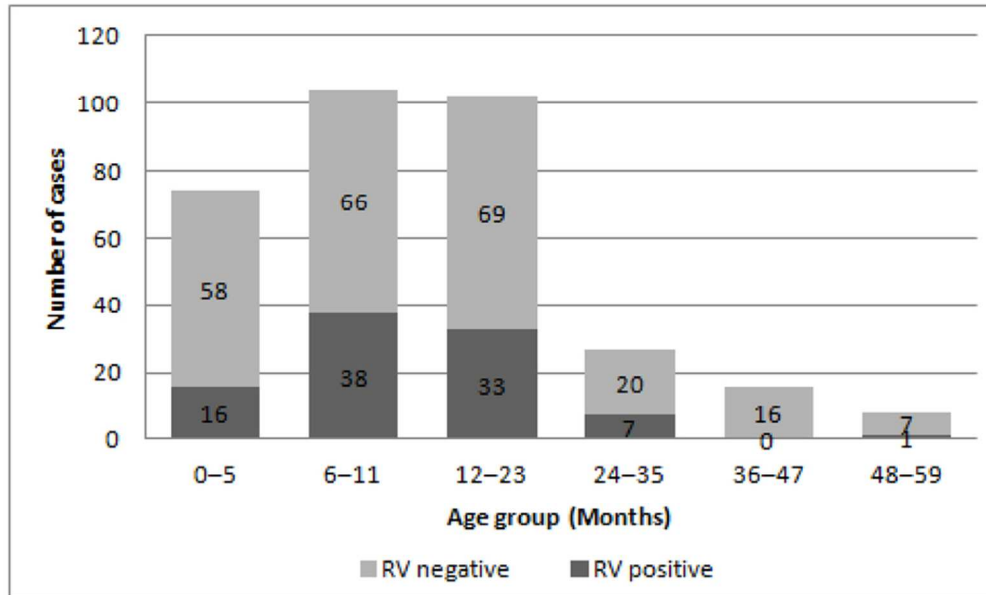

Distribution of GE cases by RV status by age groups (N = 332)

Note: RV status of one subject in the age group 0-5 Months was unknown  
77x47mm (300 x 300 DPI)

Review only

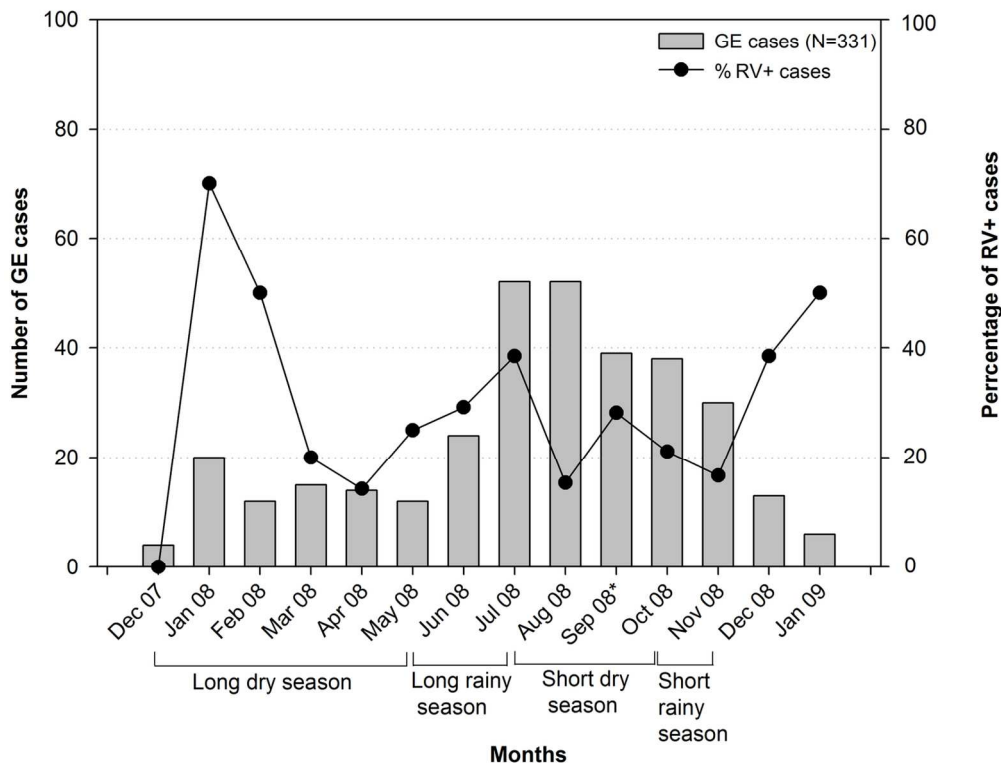

Seasonality of acute GE and RVGE hospitalizations (N=331)  
134x112mm (300 x 300 DPI)

For peer review only

1  
2  
3  
4  
5  
6  
7  
8  
9  
10  
11  
12  
13  
14  
15  
16  
17  
18  
19  
20  
21  
22  
23  
24  
25  
26  
27  
28  
29  
30  
31  
32  
33  
34  
35  
36  
37  
38  
39  
40  
41  
42  
43  
44  
45  
46  
47  
48  
49  
50  
51  
52  
53  
54  
55  
56  
57  
58  
59  
60

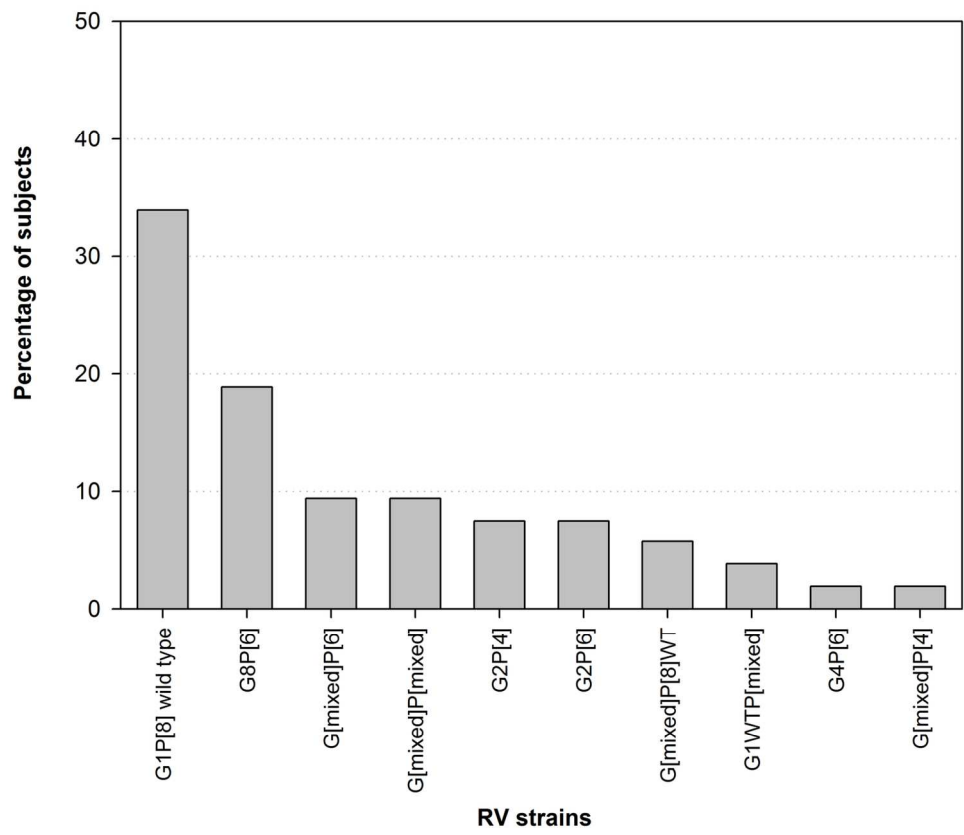

Distribution of RV G and P types (N=331)  
136x122mm (300 x 300 DPI)

only

## STROBE Statement

<http://www.strobe-statement.org/index.php?id=available-checklists>

### Checklist of items that should be included in reports of observational studies

| Item                      |    | Recommendation                                                                                                                                                                                                                                                                                                                                                                                                                                                         | Page No |
|---------------------------|----|------------------------------------------------------------------------------------------------------------------------------------------------------------------------------------------------------------------------------------------------------------------------------------------------------------------------------------------------------------------------------------------------------------------------------------------------------------------------|---------|
|                           | No |                                                                                                                                                                                                                                                                                                                                                                                                                                                                        |         |
| <b>Title and abstract</b> | 1  | (a) Indicate the study's design with a commonly used term in the title or the abstract                                                                                                                                                                                                                                                                                                                                                                                 | 1       |
|                           |    | (b) Provide in the abstract an informative and balanced summary of what was done and what was found                                                                                                                                                                                                                                                                                                                                                                    | 3,4     |
| <b>Introduction</b>       |    |                                                                                                                                                                                                                                                                                                                                                                                                                                                                        |         |
| Background/<br>rationale  | 2  | Explain the scientific background and rationale for the investigation being reported                                                                                                                                                                                                                                                                                                                                                                                   | 7,8     |
| Objectives                | 3  | State specific objectives, including any prespecified hypotheses                                                                                                                                                                                                                                                                                                                                                                                                       | 9       |
| <b>Methods</b>            |    |                                                                                                                                                                                                                                                                                                                                                                                                                                                                        |         |
| Study design              | 4  | Present key elements of study design early in the paper                                                                                                                                                                                                                                                                                                                                                                                                                | 10      |
| Setting                   | 5  | Describe the setting, locations, and relevant dates, including periods of recruitment, exposure, follow-up, and data collection                                                                                                                                                                                                                                                                                                                                        | 10,11   |
| Participants              | 6  | (a) <i>Cohort study</i> —Give the eligibility criteria, and the sources and methods of selection of participants. Describe methods of follow-up<br><i>Case-control study</i> —Give the eligibility criteria, and the sources and methods of case ascertainment and control selection. Give the rationale for the choice of cases and controls<br><i>Cross-sectional study</i> —Give the eligibility criteria, and the sources and methods of selection of participants | 10      |
|                           |    | (b) <i>Cohort study</i> —For matched studies, give matching criteria and number of exposed and unexposed<br><i>Case-control study</i> —For matched studies, give matching criteria and the number of controls per case                                                                                                                                                                                                                                                 | NA      |
| Variables                 | 7  | Clearly define all outcomes, exposures, predictors, potential confounders, and effect modifiers. Give diagnostic criteria, if applicable                                                                                                                                                                                                                                                                                                                               | 10-12   |
| Data sources/             | 8* | For each variable of interest, give sources of data and                                                                                                                                                                                                                                                                                                                                                                                                                | 12-13   |

|                        |     |                                                                                                                                                                                                                                                                                                           |       |
|------------------------|-----|-----------------------------------------------------------------------------------------------------------------------------------------------------------------------------------------------------------------------------------------------------------------------------------------------------------|-------|
| measurement            |     | details of methods of assessment (measurement). Describe comparability of assessment methods if there is more than one group                                                                                                                                                                              |       |
| Bias                   | 9   | Describe any efforts to address potential sources of bias                                                                                                                                                                                                                                                 | NA    |
| Study size             | 10  | Explain how the study size was arrived at                                                                                                                                                                                                                                                                 | 12    |
| Quantitative variables | 11  | Explain how quantitative variables were handled in the analyses. If applicable, describe which groupings were chosen and why                                                                                                                                                                              | 12    |
| Statistical methods    | 12  | (a) Describe all statistical methods, including those used to control for confounding                                                                                                                                                                                                                     | 12-13 |
|                        |     | (b) Describe any methods used to examine subgroups and interactions                                                                                                                                                                                                                                       | 11    |
|                        |     | (c) Explain how missing data were addressed                                                                                                                                                                                                                                                               | NA    |
|                        |     | (d) <i>Cohort study</i> —If applicable, explain how loss to follow-up was addressed<br><i>Case-control study</i> —If applicable, explain how matching of cases and controls was addressed<br><i>Cross-sectional study</i> —If applicable, describe analytical methods taking account of sampling strategy | NA    |
|                        |     | (e) Describe any sensitivity analyses                                                                                                                                                                                                                                                                     | NA    |
| <b>Results</b>         |     |                                                                                                                                                                                                                                                                                                           |       |
| Participants           | 13* | (a) Report numbers of individuals at each stage of study—eg numbers potentially eligible, examined for eligibility, confirmed eligible, included in the study, completing follow-up, and analysed                                                                                                         | 14-15 |
|                        |     | (b) Give reasons for non-participation at each stage                                                                                                                                                                                                                                                      | 14-15 |
|                        |     | (c) Consider use of a flow diagram                                                                                                                                                                                                                                                                        | NA    |
| Descriptive data       | 14* | (a) Give characteristics of study participants (eg demographic, clinical, social) and information on exposures and potential confounders                                                                                                                                                                  | 14-15 |
|                        |     | (b) Indicate number of participants with missing data for each variable of interest                                                                                                                                                                                                                       | NA    |
|                        |     | (c) <i>Cohort study</i> —Summarise follow-up time (eg, average and total amount)                                                                                                                                                                                                                          | NA    |
| Outcome data           | 15* | <i>Cohort study</i> —Report numbers of outcome events or summary measures over time                                                                                                                                                                                                                       | NA    |
|                        |     | <i>Case-control study</i> —Report numbers in each exposure                                                                                                                                                                                                                                                | NA    |

|                          |    |                                                                                                                                                                                                              |       |
|--------------------------|----|--------------------------------------------------------------------------------------------------------------------------------------------------------------------------------------------------------------|-------|
|                          |    | category, or summary measures of exposure                                                                                                                                                                    |       |
|                          |    | <i>Cross-sectional study</i> —Report numbers of outcome events or summary measures                                                                                                                           | 15-16 |
| Main results             | 16 | (a) Give unadjusted estimates and, if applicable, confounder-adjusted estimates and their precision (eg, 95% confidence interval). Make clear which confounders were adjusted for and why they were included | 15-19 |
|                          |    | (b) Report category boundaries when continuous variables were categorized                                                                                                                                    | NA    |
|                          |    | (c) If relevant, consider translating estimates of relative risk into absolute risk for a meaningful time period                                                                                             | NA    |
| Other analyses           | 17 | Report other analyses done—eg analyses of subgroups and interactions, and sensitivity analyses                                                                                                               | 16-19 |
| <b>Discussion</b>        |    |                                                                                                                                                                                                              |       |
| Key results              | 18 | Summarise key results with reference to study objectives                                                                                                                                                     | 20    |
| Limitations              | 19 | Discuss limitations of the study, taking into account sources of potential bias or imprecision. Discuss both direction and magnitude of any potential bias                                                   | 23    |
| Interpretation           | 20 | Give a cautious overall interpretation of results considering objectives, limitations, multiplicity of analyses, results from similar studies, and other relevant evidence                                   | 25    |
| Generalisability         | 21 | Discuss the generalisability (external validity) of the study results                                                                                                                                        | 23-24 |
| <b>Other information</b> |    |                                                                                                                                                                                                              |       |
| Funding                  | 22 | Give the source of funding and the role of the funders for the present study and, if applicable, for the original study on which the present article is based                                                | 27    |

\*Give information separately for cases and controls in case-control studies and, if applicable, for exposed and unexposed groups in cohort and cross-sectional studies.

**Note:** An Explanation and Elaboration article discusses each checklist item and gives methodological background and published examples of transparent reporting. The STROBE checklist is best used in conjunction with this article (freely available on the Web sites of PLoS Medicine at <http://www.plosmedicine.org/>, Annals of Internal Medicine at <http://www.annals.org/>, and Epidemiology at <http://www.epidem.com/>).

1  
2  
3  
4  
5  
6  
7  
8  
9  
10  
11  
12  
13  
14  
15  
16  
17  
18  
19  
20  
21  
22  
23  
24  
25  
26  
27  
28  
29  
30  
31  
32  
33  
34  
35  
36  
37  
38  
39  
40  
41  
42  
43  
44  
45  
46  
47  
48  
49  
50  
51  
52  
53  
54  
55  
56  
57  
58  
59  
60

Information on the STROBE Initiative is available at [www.strobe-statement.org](http://www.strobe-statement.org).

For peer review only

EPI-RV-Ivory Coast  
Journal resubmission BMJ Open

## Original Research

**Title:** Hospital-based surveillance of rotavirus gastroenteritis among children under five years of age in the Republic of ~~Côte d'Ivoire~~Ivory Coast: A cross-sectional study

**Authorship:** Akoua-Koffi Chantal,<sup>1</sup> Asse Kouadio Vincent,<sup>2</sup> Yao Atteby Jean Jacques<sup>3</sup>

### Affiliations:

<sup>1</sup>Pasteur Institute of ~~Côte d'Ivoire~~Ivory Coast/ Medical sciences Training and Research Unit of Bouake, ~~Côte d'Ivoire~~Ivory Coast

<sup>2</sup>Northern Abobo Hospital Medical Pediatrics Department, ~~Côte d'Ivoire~~Ivory Coast

<sup>3</sup>Pediatrics Department of the University Teaching Hospital of Treichville/ Medical Sciences Training and Research Unit of Abidjan, ~~Côte d'Ivoire~~Ivory Coast

**Correspondence to:** Akoua-Koffi Chantal

**Address:** Pasteur Institute of ~~Côte d'Ivoire~~Ivory Coast/Medical sciences Training and Research Unit of Bouake (Bouake Medical School)

P box: 490 Abidjan 01, Republic of ~~Côte d'Ivoire~~Ivory Coast

**Tel:** +225 07 98 47 57/ +225 02 03 63 47

**Email:** [akouamc@yahoo.fr](mailto:akouamc@yahoo.fr)

**Keywords:** ~~Côte d'Ivoire~~Ivory Coast, disease burden, rotavirus, gastroenteritis

**Word count: Abstract:** 272289/300; **Manuscript:** 30653159/4000



EPI-RV-Ivory Coast  
Journal resubmission BMJ Open

**Abbreviations:**

AGE: acute gastroenteritis; CI: confidence interval; ER: emergency room; GE:  
gastroenteritis; GSK: GlaxoSmithKline; IV: intravenous; RT-PCR: reverse  
transcriptase polymerase chain reaction; RV: rotavirus; WAZ: weight-for-age Z-  
scores.

For peer review only

EPI-RV-Ivory Coast  
Journal resubmission BMJ Open

## ABSTRACT

**Objectives:** To estimate the proportion of rotavirus gastroenteritis (RVGE) among children aged less than five years who ~~were~~ had been diagnosed with acute gastroenteritis (AGE) and admitted to hospitals and emergency rooms (ERs). The seasonal distribution of RVGE and most prevalent RV strains were also assessed.

**Design:** ~~An observational, prospective~~ cross-sectional hospital-based surveillance study.

**Setting:** Five ~~reference~~ reference pediatric hospitals across Abidjan.

**Participants:** Children aged less than five years, who were hospitalized/ visiting ERs for WHO-defined AGE ~~as defined by the WHO~~ were enrolled. Written informed consent was obtained from parents/ guardians ~~prior to~~ before enrollment. Children who acquired nosocomial infection were excluded from the study.

**Primary and secondary outcome measures:** The proportion of RVGE among AGE hospitalizations and ER visits were expressed with ~~their~~ 95% exact confidence interval (CI). Stool samples were collected from all enrolled children ~~to~~ and were tested for the presence of RV using an enzyme immunoassay. RV positive samples were serotyped using reverse transcriptase polymerase chain reaction.

**Results:** Of 357 enrolled children (mean age 13.6 ± 11.14 months) ~~enrolled~~, 332 were included in the final analyses; 56.3% (187/332) were hospitalized and 43.7% (145/332) were admitted to ERs. The proportion of RVGE hospitalizations and ER

EPI-RV-Ivory Coast  
Journal resubmission BMJ Open

1  
2  
3  
4 visits among all AGE cases was 30.1% (95% CI: 23.6-37.3) and 26.9% (95% CI:  
5  
6 19.9-34.9), respectively. Ninety-five ~~(28.6%)~~ children (28.6%) were RV positive;  
7  
8 ~~and~~ the highest number of RVGE cases was observed in children aged 6-11  
9  
10 months. The number of GE cases peaked in July and August 2008; the highest  
11  
12 percentage of RV positive cases was observed in January 2008. G1P[8]wild-type  
13  
14 and G8P[6] were the most commonly detected strains.  
15  
16  
17

18  
19 **Conclusion:** RVGE causes substantial morbidity among children under five years  
20  
21 of age and remains a health concern in the Republic of Côte d'IvoireIvory Coast,  
22  
23 where implementation of prevention strategies such as vaccination might help to  
24  
25 reduce ~~the~~ disease burden.  
26  
27

28  
29 **Trial registration:** Not applicable  
30  
31  
32  
33  
34  
35  
36  
37  
38  
39  
40  
41  
42  
43  
44  
45  
46  
47  
48  
49  
50  
51  
52  
53  
54  
55  
56  
57  
58  
59  
60

## ARTICLE SUMMARY

### Article focus

- The burden of Rotavirus gastroenteritis (RVGE) ~~disease burden~~ in the Republic of ~~Côte d'Ivoire~~Ivory Coast is substantial and recent epidemiological data ~~on the epidemiology of RVGE~~ are limited.
- The main focus of this study was to estimate the proportion of RV among young children hospitalized for treated at emergency rooms (ER) for acute gastroenteritis (AGE) ~~or treated at emergency rooms (ER) for AGE~~.
- We also investigated ~~Additionally, we sought to determine~~ the seasonal distribution of RVGE and ~~to identify~~ the prevalent RV types in the study population.

### Key messages

- RVGE accounts for about 28.6% of AGE hospitalizations and 30.1% ER visits in the Republic of ~~Côte d'Ivoire~~Ivory Coast and particularly affects children ~~aged less younger~~ than 24 months of age.
- The number of RVGE cases peaked during July and August 2008. The most prevalent RV strains were G1P[8] wild-type and G8P[6].
- Implementation of preventative measure such as RV vaccination could help to reduce the ~~disease~~ burden of RVGE in the Republic of ~~Côte d'Ivoire~~Ivory Coast.

**Strengths and limitations of this study:**

- ~~The Our~~ study was conducted in large city-based pediatric hospitals ~~across the city~~ and ~~hence~~ our findings are therefore likely to be representative of the whole population.
- ~~The Our~~ systematic approach ~~for followed to enrollment children enabled~~ allowed the easy identification of AGE cases.
- ~~Only Our study enrolled only~~ a ~~reduced~~ proportion of all ~~the~~ reported AGE cases ~~could be enrolled in this study~~ and ~~included~~ only severe cases were included.

## INTRODUCTION

Wild-type, rotavirus (RV) causes approximately 111 million ~~episodes of~~ gastroenteritis (GE) episodes, 25 million clinic visits, two million hospitalizations and over 453,000 deaths ~~per each~~ year among children younger than five years of age.[1, 2] It has been reported that RV mortality is ~~the~~ highest among the low income countries ~~in of~~ Asia, Africa and Latin America.[3] A systematic review and meta-analysis (~~2009~~) of published studies in 2009 reported found that, ~~in sub-Saharan Africa,~~ the overall mortality rate associated with RV infection in children under five years of age in sub-Saharan Africa was 243.3 (~~95% CI 187.6–301.7~~) deaths per 100,000 children (95% CI 187.6–301.7).[4] Globally, RV infection rates are also highest among younger children ~~aged less than five years~~, with approximately 95% children ~~having experienc~~ing at least one episode of RVGE by the time they ~~are reach~~ five years of age.[5]

RVGE is characterized by fever, diarrhea and vomiting, ~~that lead~~ing to severe dehydration and increased hospitalization. Over 90% of children with RVGE suffer from dehydration-associated mortality due to diarrhea and associated vomiting.[6-8] It has been suggested that RV infections are more common during the cooler months of the year and that RVGE disease burden is similar in both high and low income nations.[1] However, due to malnutrition and lack of access to appropriate treatment facilities, it is the children in from the low-income countries who die more frequently.[1]

EPI-RV-Ivory Coast  
Journal resubmission BMJ Open

1  
2  
3  
4 As improvements in hygiene and sanitation have not been ~~associated~~  
5 ~~with~~accompanied by reductions in the incidence of RV-associated diseases,[9]  
6  
7  
8  
9 vaccination against RV is therefore considered as a public health priority for low  
10  
11 income nations.[10] The introduction of RV vaccination could have significant  
12  
13 ~~potential and visible~~ benefits to for children aged less than three years, and might  
14  
15 help to assist the reduction of diarrhea-associated childhood morbidity and  
16  
17 mortality in low income countries and ~~of RV-associated related~~ hospitalizations in  
18  
19 high income countries.[11, 12]  
20  
21  
22  
23

24 The most common globally circulating RV serotypes associated with RVGE  
25  
26 ~~circulating worldwide~~ are G1, G2, G3 and G4.[13] In addition ~~to these~~, G9 has  
27  
28 emerged over the past decade as a globally important serotype ~~in the last~~  
29  
30 ~~decade~~. [14] Together, these serotypes are responsible for 95% of worldwide  
31  
32 pediatric RVGE cases.[15]  
33  
34  
35

36 ~~In the Republic of Côte d'Ivoire, t~~The epidemiology of RV infection has been  
37  
38 followed in several small studies conducted in Abidjan in the Republic of Ivory  
39  
40 Coast, [16–21] but recent data ~~on RVGE disease burden~~ for this region are limited.  
41  
42  
43 Nevertheless, Data on RVGE disease, the number of hospitalizations and the  
44  
45 number of emergency room (ER) visits following acute GE (AGE) are critical to  
46  
47 formulate effective policies to control RV-related AGE and. ~~These data~~ are also  
48  
49 important to fully determine the need for RV vaccines and understand the possible  
50  
51 impact of their introduction.  
52  
53  
54  
55  
56  
57  
58  
59  
60

EPI-RV-Ivory Coast  
Journal resubmission BMJ Open

1  
2  
3  
4  
5 This study ~~aimed~~ was designed to estimate the proportion of RVGE among  
6  
7 children younger than five years of age who were diagnosed with AGE and  
8  
9 admitted to hospitals and ERs in the Republic of Ivory Coast. ~~Seasonal~~ The  
10  
11 seasonal distribution of RVGE and ~~identification of the~~ prevalent RV types ~~in the~~  
12  
13 Republic of Côte d'Ivoire ~~was~~ were also studied.  
14  
15  
16  
17  
18  
19  
20  
21  
22  
23  
24  
25  
26  
27  
28  
29  
30  
31  
32  
33  
34  
35  
36  
37  
38  
39  
40  
41  
42  
43  
44  
45  
46  
47  
48  
49  
50  
51  
52  
53  
54  
55  
56  
57  
58  
59  
60



EPI-RV-Ivory Coast  
Journal resubmission BMJ Open

## METHODS

### Study design

This ~~observational~~, cross-sectional hospital-based surveillance study was conducted across five ~~centers~~ reference pediatric hospitals in Abidjan, the Republic of ~~Côte d'Ivoire~~ Ivory Coast between December 2007 and February 2009. The study was approved by the national Independent Ethics Committee (Ministère de la Santé et de l'Hygiène Publique, Abidjan) and conducted in accordance with ~~the~~ Good Clinical Practice, ~~the~~ Declaration of Helsinki (version 1996) and ~~the~~ applicable local regulations ~~of the country, and w~~ritten informed consent was obtained from parents/ guardians before children were enrolled.

Children presenting AGE were enrolled in this study ~~identified~~ by checking ~~the~~ hospital and ER logbooks. Males or female childrens aged less than five years, who were hospitalized or visited ER for AGE ( $\geq 3$  looser than normal stools per day with or without  $\geq 2$  episodes of vomiting within 24 hours) were included in the study. Children were excluded if they acquired AGE by possible nosocomial infection (within 12 hours after hospital admission).

Unique study numbers were ~~sequentially~~ assigned sequentially to all enrolled children in order to maintain their confidentiality. Parents/ guardians were interviewed and medical records were reviewed by the site staff to complete the study questionnaire and/ or case report form. Information ~~such as~~ including demography ~~ie parameters~~ (date of birth, gender, height and weight, nutritional status, and area of residence); admission date and diagnosis at admission, date of

EPI-RV-Ivory Coast  
Journal resubmission BMJ Open

1  
2  
3  
4 discharge, ~~diagnosis at discharge~~ and administration of oral and/ or intravenous  
5  
6 rehydration/ antibiotics were recorded and encoded in the study database. Details  
7  
8 such as body temperature, duration of diarrhea or vomiting, treatment ~~including~~  
9  
10 ~~hospitalization~~ and behavioral symptoms were also recorded. The severity of  
11  
12 RVGE was defined according to the Vesikari Scale (mild: score <7; moderate:  
13  
14 score 7–10 and severe: score ≥11).[22]  
15  
16  
17

18  
19 Stool samples collected within 4–10 days of the onset of GE ~~from all enrolled~~  
20  
21 ~~children as part of the study procedures~~ were ~~labeled, refrigerated (4°C–8°C),~~  
22  
23 ~~frozen stored at a temperature of (-20°C to -70°C)~~ and then transported to ~~the~~  
24  
25 Pasteur Institute, Abidjan, within 72 hours of ~~sample collection~~ ~~for testing~~. RV  
26  
27 testing was performed using ~~the~~ IDEIA rotavirus kit (DAKO Ltd., Cambridgeshire,  
28  
29 UK) provided by the regional laboratory (~~Ivory Coast National laboratory for~~  
30  
31 ~~rotavirus, affiliated to the World Health Organization [WHO] regional reference~~  
32  
33 ~~laboratory located in Accra-Ghana [West Africa], at the Noguchi Memorial Institute~~  
34  
35 ~~for Medical Research West Africa Regional Rotavirus Reference laboratory~~). ~~A~~  
36  
37 ~~random subset of~~ RV positive stool samples were subsequently tested using  
38  
39 reverse transcriptase-polymerase chain reaction (RT-PCR) of the VP7 and VP4  
40  
41 genes followed by reverse hybridization ~~on a strip~~ ~~at the~~ DDL Diagnostic  
42  
43 Laboratory (Rijswijk, The Netherlands) to identify G and P genotypes and to  
44  
45 differentiate the presence of wild-type G1 RV from the vaccine strain virus.[23] ~~A~~  
46  
47 ~~visible pattern is observed on the strip after hybridization which is specific to each~~  
48  
49 ~~genotype~~. As a complementary tool, sequence analysis was performed to identify  
50  
51  
52  
53  
54  
55  
56  
57  
58  
59  
60

EPI-RV-Ivory Coast  
Journal resubmission BMJ Open

1  
2  
3  
4 the ~~most prevalent~~ genotypes for samples that yielded an ~~aberrant or~~ unclear  
5 pattern that could not be recognized. The resulting sequence was analyzed by  
6  
7  
8  
9  
10 BLAST search against the GenBank database to determine the RV genotype.[23]

## 11 **Analyses**

12  
13  
14 All children meeting the pre-defined eligibility criteria were included in the final  
15  
16 analyses.  
17

18  
19  
20 ~~Age at onset, the seasonal distribution of RVGE and the occurrence of RV types~~  
21 ~~were recorded~~. The occurrence of severe dehydrating RVGE (based on the  
22  
23 Vesikari scale [22]) administered treatment (including intravenous [IV] re-  
24  
25 hydration), duration of hospitalization and outcome were all reported, together with-  
26  
27 the seasonal distribution of RVGE and the occurrence of RV types.  
28  
29  
30  
31

32  
33 All statistical analyses were performed using Statistical Analysis System (SAS®)  
34  
35 version 9.2 and the graphs were generated using Microsoft Excel®. Categorical  
36  
37 data such as gender, seasonal distribution and disease severity were presented as  
38  
39 proportions with one decimal. Burden of GE/ RVGE among hospitalizations/ ER  
40  
41 visits were expressed as proportions with their 95% exact confidence interval (CI).  
42  
43 Exploratory analyses of estimation of the crude odds ratio were performed using  
44  
45 univariate logistic regression considering RV status as the outcome variable with  
46  
47 clinical characteristics and discharge outcome as confounding factors. Multinomial  
48  
49 univariate logistic regression was also explored to estimate the association  
50  
51  
52  
53  
54 between outcome at discharge as the dependent variable and RV status ~~and~~  
55  
56 ~~nutritional status~~ as the independent factors. ~~The 95% Walds CI was also~~  
57  
58  
59  
60

EPI-RV-Ivory Coast  
Journal resubmission BMJ Open

1  
2  
3  
4 estimated. Nutritional status was derived using the weight-for-age Z-scores (WAZ)  
5  
6  
7 based on the WHO child growth standards. Association between these derived  
8  
9 nutritional status and the RV positivity were analyzed using the chi-square test with  
10  
11 95% exact CI. The 95% Walds CI was also estimated.  
12  
13

14  
15  
16  
17  
18  
19  
20  
21  
22  
23  
24  
25  
26  
27  
28  
29  
30  
31  
32  
33  
34  
35  
36  
37  
38  
39  
40  
41  
42  
43  
44  
45  
46  
47  
48  
49  
50  
51  
52  
53  
54  
55  
56  
57  
58  
59  
60

For peer review only

## RESULTS

### Demographic characteristics

A total of 1330 children (917 hospitalized and 413 visiting ERs) ~~with presenting~~ AGE were identified from hospital logs. ~~Of whom these,~~ 357 children were enrolled into the study. Informed consent was not collected ~~from for the patents/ guardians of~~ 973 children, due to: ~~parent refusal, samples not~~ collection of ~~sampled,~~ and failure of the surveillance to capture the ~~childrencases~~. The mean age (standard deviation) of ~~the~~ enrolled children was 13.6 months ( $\pm$  11.14 months) (Table 1).

**Table 1: Demographic characteristics of enrolled children (N = 357)**

| Characteristics | Parameters                                   | Total<br>(N <sup>a</sup> = 357) |                 | Emergency<br>Room<br>(N = 161) |                 | Hospitalized<br>(N = 196) |                 |
|-----------------|----------------------------------------------|---------------------------------|-----------------|--------------------------------|-----------------|---------------------------|-----------------|
|                 |                                              | n <sup>b</sup>                  | % <sup>c</sup>  | n                              | %               | n                         | %               |
|                 | N                                            | 357                             | -               | 161                            | -               | 196                       | -               |
| Age (Months)    | Mean                                         | 13.6                            | -               | 13.7                           | -               | 13.5                      | -               |
|                 | SD <sup>d</sup>                              | 11.14                           | -               | 11.39                          | -               | 10.96                     | -               |
|                 | Female                                       | 152                             | 42.6            | 69                             | 42.9            | 83                        | 42.3            |
| Gender          | Male                                         | 205                             | 57.4            | 92                             | 57.1            | 113                       | 57.7            |
|                 | <del>Live in the</del><br><del>Abidjan</del> | <del>347</del>                  | <del>97.2</del> | <del>158</del>                 | <del>98.1</del> | <del>189</del>            | <del>96.4</del> |

<sup>a</sup>Number of children

<sup>b</sup>Number of children in a given category

<sup>c</sup>n / N x 100

<sup>d</sup>standard deviation

A total of 332 children were included in the final analysis; 25 were excluded due to not meeting ~~there were 25 exclusions: two did not meet~~ the inclusion/ exclusion criteria (protocol violation) in two cases, and failure to either collect or analyze the stool samples ~~were not collected or analyzed~~ for RV ~~(due to insufficient stool sample)~~ for ~~in~~ the remaining 23 children.

Among those included in the final ~~analyses~~ analysis, 56.3% (187/332) children ~~were~~ had been hospitalized and the remaining 43.7% (145/332) had visited ~~the an~~ ER.

### Proportion of GE and RVGE hospitalizations

The proportion of all AGE-related hospitalizations and ER visits that were diagnosed with RVGE was 30.1% (n = 56; 95% CI: 23.6–37.3) and 26.9% (n = 39; 95% CI: 19.9–34.9), respectively.

Most of the children hospitalized and visiting the ER due to AGE corresponded to children under two years of age (84.8% and 84.5%, respectively). The number of RV positive and negative children ~~hospitalized and those who visited the ER for GE~~ stratified by age ~~groups~~ is shown in Figure 1 ~~Table 2~~. Ninety-five children (28.6%) were RV positive, of which whom over 80% ~~occurred were in children~~ aged less than 24 months ~~(Table 2)~~. The highest number of RVGE cases was reported seen in children aged 6–11 months (40.0% [38/95]) (Figure 1).

**Table 2: ~~Distribution of GE cases by ER visits, hospitalizations and RV status by age groups (N = 332)~~**

<sup>a</sup>Number of children

EPI-RV-Ivory Coast  
Journal resubmission BMJ Open

<sup>b</sup>Number of children in a given category  
<sup>c</sup> $n / N \times 100$

The seasonal distribution of RV-attributable GE hospitalizations ~~attributed to RV infection~~ is shown in Figure 24. The number of GE cases was highest in July and August 2008 and the percentage of RV positive cases was highest in January 2008.

### Clinical characteristics of GE and RVGE hospitalizations

Among ~~both~~ RV positive and ~~RV~~ negative children, severe GE (score  $\geq 11$  on the Vesikari scale) was ~~reported~~ recorded in 64.2% (61/95) and 55.5% (131/236) children before hospitalization, respectively (Table 23).

The percentage of children recording the GE-associated symptoms ~~associated with GE~~ (diarrhea, vomiting and fever) was similar across RV positive and negative groups before hospitalization. However, a significant (P-value = 0.0037) association between vomiting and RV positive status was observed ~~prior to~~ before hospital admissionization (Table 23).

Nutritional status based on weight indicated that ~~children who were~~ adequately and moderately malnourished children were distributed similarly across both RV positive and negative groups. However, a higher number of severely malnourished children ~~were was~~ observed in the RV negative group (Table 23).

Oral rehydration was the most commonly used treatment ~~used~~ for GE in both RV positive and negative groups (70.5% and 75.8%, respectively), followed by intravenous rehydration therapy (54.7% and 53.0%, respectively).

At discharge, the majority of children among both RV positive and ~~RV~~ negative groups (71.6% [68/95] and 78.0% [184/236], respectively) had ongoing GE. Eight RV negative children while (3.4% (8/236) of children in the RV negative group died, of whom (Table 3). Among the children who died, all but one children except one (87.5% [7/8]) were severely malnourished. The unadjusted odds ratio estimation estimate indicated that the severely malnourished children had 22.2 (95% CI: 2.5–198.8) times higher risk of dying when as compared to children with adequate nutritional status (P-value = 0.0056) (Table 2).

**Table 32: Clinical characteristics of children by RV status (N=331)**

| Characteristic                                     | RV positive<br>(N <sup>a</sup> = 95)<br>n <sup>b</sup> (% <sup>c</sup> ) | RV negative<br>(N = 236)<br>n (%) | P-value |
|----------------------------------------------------|--------------------------------------------------------------------------|-----------------------------------|---------|
| <b>Severity<sup>d</sup> before hospitalization</b> |                                                                          |                                   |         |
| Mild (<7)                                          | 6 (6.3)                                                                  | 27 (11.4)                         | 0.2300* |
| Moderate (7–10)                                    | 28 (29.5)                                                                | 78 (33.1)                         |         |
| Severe (≥11)                                       | 61 (64.2)                                                                | 131 (55.5)                        |         |
| <b>Severity during hospitalization</b>             |                                                                          |                                   |         |
| Mild (<7)                                          | 28 (29.5)                                                                | 55 (23.3)                         | 0.1946* |
| Moderate (7–10)                                    | 36 (37.9)                                                                | 115 (48.7)                        |         |
| Severe (≥11)                                       | 31 (32.6)                                                                | 66 (28.0)                         |         |



EPI-RV-Ivory Coast  
Journal resubmission BMJ Open

| <b>Symptoms before hospitalization</b>           |            |            |          |
|--------------------------------------------------|------------|------------|----------|
| Diarrhea                                         | 95 (100.0) | 235 (99.6) | 1.0000** |
| Vomiting                                         | 81 (85.3)  | 170 (72.0) | 0.0037** |
| Fever                                            | 44 (46.3)  | 116 (49.2) | 0.8557*  |
| <b>Symptoms during hospitalization</b>           |            |            |          |
| Diarrhea                                         | 90 (94.7)  | 229 (97.0) | 0.3359** |
| Vomiting                                         | 42 (44.2)  | 95 (40.3)  | 0.8065** |
| Fever                                            | 47 (49.5)  | 118 (50.0) | 0.9639** |
| <b>Treatment received before hospitalization</b> |            |            |          |
| Oral rehydration                                 | 39 (41.1)  | 96 (40.7)  | 0.7580*  |
| IV rehydration                                   | 1 (1.1)    | 1 (0.4)    | 0.5810** |
| Antibiotics                                      | 25 (26.3)  | 47 (19.9)  | 0.3701*  |
| <b>Treatment received during hospitalization</b> |            |            |          |
| Oral rehydration                                 | 67 (70.5)  | 179 (75.8) | 0.2049** |
| IV rehydration                                   | 52 (54.7)  | 125 (53.0) | 0.9507** |
| Antibiotics                                      | 30 (31.6)  | 81 (34.3)  | 0.4843** |
| <b>Classification of nutrition</b>               |            |            |          |
| Overweight                                       | 5 (5.3)    | 8 (3.4)    | 0.1981*  |
| Adequate (Normal)                                | 66 (69.5)  | 152 (64.4) |          |
| Moderately malnourished                          | 15 (15.8)  | 32 (13.6)  |          |
| Severely malnourished                            | 9 (9.5)    | 44 (18.6)  |          |
| <b>Outcome at discharge</b>                      |            |            |          |
| Recovered                                        | 27 (28.4)  | 40 (16.9)  | 0.0145** |
| Ongoing GE                                       | 68 (71.6)  | 184 (78.0) |          |
| Transferred                                      | 0 (0.0)    | 4 (1.7)    |          |
| Died                                             | 0 (0.0)    | 8 (3.4)    |          |

EPI-RV-Ivory Coast  
Journal resubmission BMJ Open

Note<sup>1</sup>: One child was excluded from analysis as RV status was not determined.

Note<sup>2</sup>: Nutritional status were derived using the weight-for-age Z-scores (WAZ)

<sup>a</sup>Number of children

<sup>b</sup>Number of children in a given category

<sup>c</sup> $n / N \times 100$

<sup>d</sup>Severity using the 20-point Vesikari scale

\*chi square P-value

\*\*Fisher Exact test P-value

## RV type distribution

Fifty three of ~~the~~ 95 RV positive stool samples were assessed for RV type in this study. ~~Among these, t~~he most prevalent RV types were G1P[8] wild-type (34.0% [18/53]) and G8P[6] (18.9% [10/53]). Mixed RV types were detected in 30.2% (16/53). The RV vaccine strain (G1P[8] vaccine strain) was not detected in any ~~of the~~ samples. The other ~~common RV types~~ detected RV types are ~~depicted by decreasing order of prevalence shown~~ in Figure 32.

EPI-RV-Ivory Coast  
Journal resubmission BMJ Open

## DISCUSSION

This study ~~describing into~~ RVGE disease burden found that RV infection is the primary cause of hospitalization due to GE in children aged less than five years in the Republic of ~~Côte d'Ivoire~~ Ivory Coast.

We ~~detected-identified~~ RV in 30.1% and 26.9% children ~~either~~ hospitalized ~~and-or~~ visiting ~~the an ER for AGE~~, respectively, ~~which-This~~ is consistent with an earlier epidemiological study in Abidjan that demonstrated the general prevalence of RVGE in children ~~less-younger~~ than five years ~~of age~~ to be 27.9% between 1997 and 2000.[21] In addition, a review of published studies (1975 to 1992) of RVGE in Africa detected RV in 24–29% of children hospitalized for diarrhea.[9]

In the present study, RV disease burden was predominantly observed among young children (~~over 90.0% [87/95] were~~ aged ~~6-up to 24-23~~ months), which is ~~in~~ ~~line~~ ~~consistent~~ with previous studies conducted across the African continent.[9] A study conducted in Nigeria showed that over 90.0% of RVGE positive cases were observed in children aged less than two years [24] and two independent studies conducted in Egypt (1995–1996) [25] and Libya (October 2007–September 2008) [26] indicated that the incidence of RVGE was highest among children aged 6–11 months; all comparable to the results of the present study.

-As observed in previous studies conducted in sub-Saharan Africa ~~n-regions~~ between 1975 and 1992,[9] most GE cases in this study were observed between July and August ~~of~~ 2008.

EPI-RV-Ivory Coast  
Journal resubmission BMJ Open

1  
2  
3  
4  
5  
6  
7  
8  
9  
10  
11  
12  
13  
14  
15  
16  
17  
18  
19  
20  
21  
22  
23  
24  
25  
26  
27  
28  
29  
30  
31  
32  
33  
34  
35  
36  
37  
38  
39  
40  
41  
42  
43  
44  
45  
46  
47  
48  
49  
50  
51  
52  
53  
54  
55  
56  
57  
58  
59  
60

Almost all children who died following AGE ~~cases~~ in this study were severely malnourished, indicating the importance of nutritional status in potentially determining the outcome of AGE. Previous reports substantiate these findings where malnourishment has been associated with a considerable risk of diarrhea-associated mortality.[27, 28]

~~Circulation~~ The circulation of mixed RV types in the African countries ~~have~~ has been previously reported ~~previously~~ [29, 30] ~~and~~ in this study, ~~a~~ although wild-type G1P[8] was the most commonly detected (34.0% [18/53]) RV type, several (30.2% [16/53]) mixed RV types were detected ~~in this study~~. The proportion of mixed RV types observed in this study is comparable to that reported by the WHO's RV surveillance in the African Region.[31] In this report, nearly 42% of the circulating RV types during 2006–2009 comprised of mixed RV types.[31]

There is no available anti-viral therapy for RV infection ~~[3432]~~ and ~~the~~ RVGE management ~~of RVGE~~ predominantly includes ~~replacement of fluids~~ and electrolyte replacements and improvements in sanitation and water supply.~~[3233]~~

Antibiotic treatment is not justified during RVGE and its use is limited to cases with documented bacterial co-infection. However, it has been suggested that improvements in hygiene and provision of safe water ~~supply~~ may not be as effective in the prevention of RVGE as they are to ~~other causes of GE~~ due to other causes.~~[3233]~~

Previous studies have established that RV vaccination confers protection against severe RVGE ~~disease~~ and has helped relieve the global burden of this

EPI-RV-Ivory Coast  
Journal resubmission BMJ Open

1  
2  
3  
4 disease.[~~3334–3637~~] ~~and These effects have been observed more specifically~~ in  
5  
6 similar settings in Asia, Africa and Latin America.[29, ~~3738, 3839~~] The efficacy of  
7  
8 RV vaccines against severe RVGE has been found to be 59% in South Africa and  
9  
10 Malawi [~~3940~~] and 64% in Kenya, Ghana and Mali.[~~4041~~] RV vaccination may  
11  
12 therefore represent the most effective primary public health intervention against  
13  
14 RVGE. Indeed in 2009, the ~~World Health Organization (WHO)~~ recommended the  
15  
16 inclusion of RV vaccines in the routine childhood vaccine programs of all  
17  
18 countries.[~~4142~~] ~~In the Republic of Côte d'Ivoire,~~ RV vaccines are available in the  
19  
20 private sector ~~in the Republic of Ivory Coast, but ; however,~~ no RV vaccine is  
21  
22 currently included in the universal mass vaccination program.  
23  
24  
25  
26  
27

28  
29 ~~This study provided baseline epidemiological dData presented in this study that will~~  
30  
31 ~~highlight allow policy makers to assess~~ the magnitude of ~~the RV-associated~~  
32  
33 ~~disease burdenRV problem and and might allow policy makers to~~ determine the  
34  
35 need ~~for the to~~ implementation of prevention strategies in the Republic of Côte  
36  
37 ~~d'IvoireIvory Coast. The Indeed, the~~ inclusion of a RV vaccine, ~~as a prevention~~  
38  
39 ~~strategy,~~ might ~~aid help~~ to reduce the burden of AGE and AGE-associated  
40  
41 hospitalizations.  
42  
43  
44  
45

46 The results of this study need to be interpreted in the light of several strengths and  
47  
48 limitations. Among the strengths, the systematic approach followed in this study to  
49  
50 ~~enroll-identify~~ children by checking ~~the~~ hospital and ER logbooks enabled easy  
51  
52 identification of AGE cases using standard case definitions. Secondly, the study  
53  
54 was conducted in ~~reference-reference~~ hospitals ~~that reported seeing~~ over 1,300  
55  
56  
57  
58  
59  
60

EPI-RV-Ivory Coast  
Journal resubmission BMJ Open

AGE cases annually, which complies with the recommendations of WHO's generic protocol for hospital-based ~~surveillance to estimate the burden~~ of RVGE in children [4243]. By including multiple centers, these data more closely represent the local population ~~in Abidjan, Republic of Côte d'Ivoire~~. In addition, the quality check processes performed on the laboratory testing tests of RV positive samples provides credibility to the results.

However, the study ~~results need to be interpreted with caution due to some of the~~ does have limitations. As a large number of children who presented with GE were not enrolled and tested for RV, ~~t~~The possibility of selection bias might be considered ~~since a large number of children presenting with GE were not enrolled and subsequently not tested for RV. Hence, the~~ Our reported prevalence of RVGE might have been affected by the selection of selecting only severe GE cases with more severe disease characteristics, including longer hospital stays. Nonetheless, this study provides a realistic picture of the role of RV among more severe cases of RVGE, which incur substantial direct and indirect medical costs and impact public health in this setting. ~~In addition~~ It should be noted that, of the subjects who were not enrolled ~~either~~ were either not captured during surveillance or ~~were did~~ not consented to participate in the study. Secondly, only 53 out of 95 RV positive stool samples were available for strain identification which limits the possibility of describing the circulating strains. Nevertheless, by using a reference laboratory with validated techniques and experience for PCR confirmation, it was possible to provide accurate estimates for the identified strains. Lastly, firm conclusions

EPI-RV-Ivory Coast  
Journal resubmission BMJ Open

1  
2  
3  
4 regarding the seasonality of RV and the variation in circulating RV strains could not  
5  
6  
7 been ~~considered~~ drawn as the surveillance activities were conducted for just one  
8  
9 year following recommendations from WHO.[43] Nevertheless, routine surveillance  
10  
11 is warranted as rotavirus circulation might vary from one calendar year to another.  
12  
13

14  
15  
16  
17  
18  
19  
20  
21  
22  
23  
24  
25  
26  
27  
28  
29  
30  
31  
32  
33  
34  
35  
36  
37  
38  
39  
40  
41  
42  
43  
44  
45  
46  
47  
48  
49  
50  
51  
52  
53  
54  
55  
56  
57  
58  
59  
60

For peer review only

EPI-RV-Ivory Coast  
Journal resubmission BMJ Open

## CONCLUSION

RVGE in children aged less than five years continues to be a major public health challenge in the Republic of Côte d'Ivoire/Ivory Coast. In our study, the disease, which peaked in July and August, mainly affected infants aged 6–11 months. Wild-type G1P[8] and G8P[6] were the most frequently reported RV types. The inclusion of a RV vaccine into local preventative programs disease in the Republic of Côte d'Ivoire might therefore help to reduce the disease burden of RVGE.



EPI-RV-Ivory Coast  
Journal resubmission BMJ Open

## Acknowledgements

The authors would like to thank Véronique Agbaya-Akran Awo and Mariam Drame for their contribution to the study conduct at the site; Vrushali Sanghrajka for statistical inputs; The authors also thank Dr. Lamine Soumahoro (head of Medical Department) and Dr. Marie-José Anguibi-Pokou (both employed by GlaxoSmithKline group of companies) for their involvement in monitoring of the study sites, ensuring the supply of study material and conducting trainings on Good Clinical practices. The authors acknowledge the contributions of Dominique Luyts and Karin Hallez (all employed by GlaxoSmithKline group of companies) for providing logistical support as clinical operation managers for their contribution to the study; and Rodrigo DeAntonio for intellectual inputs and review of the manuscript (all employed by GlaxoSmithKline group of companies); Dr. Ekaza Euloge from Pasteur Institute of Côte d'IvoireIvory Coast for his assistance in molecular testing in Abidjan; Dr. Berah and Dr. Niamen for sample collection; DDL Diagnostic Laboratory (The Netherlands) for performing RT-PCR and nested PCR to determine rotavirus G and P types. The authors would also like to thank Harshith Bhat (employed by GlaxoSmithKline group of companies) for medical writing, Abdelilah Ibrahim (XPE Pharma and Science for GlaxoSmithKline group of companies) and Valentine Wascotte for Publication coordination and Rodrige DeAntonio for intellectual inputs (both all employed by GlaxoSmithKline group of companies) and Julia Donnelly for copy-editing (freelance on behalf of GlaxoSmithKline group of companies).

EPI-RV-Ivory Coast  
Journal resubmission BMJ Open

## Contributors

AKC was the principal investigator and contributed to the conception, design, analysis and interpretation of the study. AKV and YAJ coordinated the study together with AKC and contributed to the interpretation of the results. All authors participated in the development of this manuscript.

## Funding

GlaxoSmithKline Biologicals SA was the funding source and was involved in all stages of the study conduct and analysis. GlaxoSmithKline Biologicals SA also took in charge all costs associated with the development and the publishing of the present manuscript.

## Competing interests

All the authors have no competing interest to declare.

## Trademark

DAKO RV EIA is a trademark of DAKO Ltd., Cambridgeshire, UK.

## REFERENCES

1. Parashar UD, Hummelman EG, Bresee JS, *et al.* Global illness and deaths caused by rotavirus disease in children. *Emerg Infect Dis* 2003;**9**:565–71.
2. Tate JE, Burton AH, Boschi-Pinto C, *et al.* WHO-coordinated Global Rotavirus Surveillance Network. 2008 estimate of worldwide rotavirus-associated mortality in children younger than 5 years before the introduction of universal rotavirus vaccination programmes: a systematic review and meta-analysis. *Lancet Infect Dis* 2012;**12**(2):136–41
3. Parashar UD, Burton A, Lanata C, *et al.* Global mortality associated with rotavirus disease among children in 2004. *J Infect Dis* 2009;**200**:S9–15.
- ~~3. Phua KB, Emmanuel SC, Goh P, *et al.* A rotavirus vaccine for infants: The Asian experience. *Ann Acad Med Singapor* 2006;**35**:38–44.~~
4. Sanchez-Padilla E, Grais RF, Guerin PJ, *et al.* Burden of disease and circulating serotypes of rotavirus infection in sub-Saharan Africa: systematic review and meta-analysis. *Lancet Infect Dis* 2009;**9**(9):567–76.
5. Parashar UD, Bresee JS, Gentsch JR, *et al.* Rotavirus. *Emerg Infect Dis* 1998;**4**:561–70.
6. Glass RI, Kilgore PE, Holman RC, *et al.* The epidemiology of rotavirus diarrhea in the United States: surveillance and estimates of disease burden. *J Infect Dis* 1996;**174**:S5–11.

EPI-RV-Ivory Coast  
Journal resubmission BMJ Open

- 1  
2  
3  
4  
5  
6  
7  
8  
9  
10  
11  
12  
13  
14  
15  
16  
17  
18  
19  
20  
21  
22  
23  
24  
25  
26  
27  
28  
29  
30  
31  
32  
33  
34  
35  
36  
37  
38  
39  
40  
41  
42  
43  
44  
45  
46  
47  
48  
49  
50  
51  
52  
53  
54  
55  
56  
57  
58  
59  
60
7. Gurwith M, Wenman W, Gurwith D, *et al.* Diarrhea among infants and young children in Canada: a longitudinal study in three northern communities. *J Infect Dis* 1983;**147**:685–92.
8. Rodriguez WJ, Kim HW, Brandt CD, *et al.* Longitudinal study of rotavirus infection and gastroenteritis in families served by a pediatric medical practice: clinical and epidemiologic observations. *Pediatr Infect Dis J* 1987;**6**:170–6.
9. Cunliffe NA, Kilgore PE, Bresee JS, *et al.* Epidemiology of rotavirus diarrhea in Africa: a review to assess the need for rotavirus immunization. *Bull WHO* 1998;**76**:525–37.
10. Naficy AB, Abu-Elyazeed R, Holmes JL, *et al.* Epidemiology of rotavirus diarrhea in Egyptian children and implications for disease control. *Am J Epidemiol* 1999;**150**:770–6.
11. Cunliffe NA, Nakagomi O. A critical time for rotavirus vaccines: a review. *Exp Rev Vac* 2005;**4**:521–32.
12. Glass RI, Bresse JS, Turcios R, *et al.* Rotavirus vaccines: Targeting the developing world. *J Infect Dis* 2005;**192**:S160–6.
13. Steele AD, Ivanoff B. Rotavirus strains circulating in Africa during 1996–1999: emergence of G9 strains and P[6] strains. *Vaccine* 2003;**21**:361–7.
14. Yang J, Wang T, Wang Y, *et al.* Emergence of human rotavirus group A genotype G9 strains, Wuhan, China. *Emerg Infect Dis* 2007;**13**:1587–9.

EPI-RV-Ivory Coast  
Journal resubmission BMJ Open

- 1  
2  
3  
4  
5  
6  
7  
8  
9  
10  
11  
12  
13  
14  
15  
16  
17  
18  
19  
20  
21  
22  
23  
24  
25  
26  
27  
28  
29  
30  
31  
32  
33  
34  
35  
36  
37  
38  
39  
40  
41  
42  
43  
44  
45  
46  
47  
48  
49  
50  
51  
52  
53  
54  
55  
56  
57  
58  
59  
60
15. Atkinson W, Hamborsky J, McIntyre L, *et al.* *Epidemiology and Prevention of Vaccine-Preventable Diseases*. Washington, DC: Public Health Foundation; 2008.
16. Cowpli-Bony M, Loukou YG, Teby A, *et al.* Technique immunoenzymatique epidemiologie des diarrhees aiguës a rotavirus chez 115 enfants diarrheiques atteints de malnutrition a Abidjan. *Rev Med Côte d'Ivoire* 1987;**79**:21–5.
17. Loukou YG, Selly E. Sous-groupes de rotavirus humains en Côte d'Ivoire determines par immunoenzymologie. *Rev Med Côte d'Ivoire* 1987;**81**:4–9.
18. Akoua-Koffi C, Faye-Kette H, Kouakou K, *et al.* Interet de l'utilisation d'un test au latex (Rotalex) pour le depistage de rotavirus dans les selles diarrheiques a Abidjan. *Med Afr Noire* 1993;**40**:599–602.
19. Akran VA, Akoua-Koffi C, Hette K, *et al.* Electrophoretotypes of rotavirus in children 15 years of age in Abidjan, Côte d'Ivoire in 1997. *Afr J Health Sci* 2001;**8**:33–8.
20. Niangue-Beugre NN, Couitchere L, Oulai SM, *et al.* Aspect epidemiologiques, cliniques et etiologiques des diarrhees aiguës des enfants ages de 1 mois a 5 ans recus dans le service de pediatrie du CHU de Treichville (Côte d'Ivoire). *Arch de Pediatrie* 2006;**13**:395–8.
21. Akoua-Koffi C, Akran V, Peenze I, *et al.* Epidemiological and virological aspects rotavirus diarrhea in Abidjan, Côte d'Ivoire (1997–2000). *Bull Soc Pathol Exot* 2007;**100**:246–9.

EPI-RV-Ivory Coast  
Journal resubmission BMJ Open

- 1  
2  
3  
4  
5  
6  
7  
8  
9  
10  
11  
12  
13  
14  
15  
16  
17  
18  
19  
20  
21  
22  
23  
24  
25  
26  
27  
28  
29  
30  
31  
32  
33  
34  
35  
36  
37  
38  
39  
40  
41  
42  
43  
44  
45  
46  
47  
48  
49  
50  
51  
52  
53  
54  
55  
56  
57  
58  
59  
60
22. Ruuska T, Vesikari T. Rotavirus disease in Finnish children: Use of numerical scores for clinical severity of diarrheal episodes. *Scand J Infect Dis* 1990;**22**:259–67.
23. van Doorn LJ, Kleter B, Hoefnagel E, *et al.* Detection and genotyping of human rotavirus VP4 and VP7 genes by reverse transcriptase PCR and reverse hybridization. *J Clin Microbiol* 2009;**47**:2704–12.
24. Junaid SA, Umeh C, Olabode AO, *et al.* Incidence of rotavirus infection in children with gastroenteritis attending Jos university teaching hospital, Nigeria. *Viral J* 2011;**8**:233.
25. Khoury H, Ogilvie I, El Khoury AC, *et al.* Burden of rotavirus gastroenteritis in the Middle Eastern and North African pediatric population. *BMC Infect Dis* 2011;**11**:9.
26. Abugalia M, Cuevas L, Kirby A, *et al.* Clinical features and molecular epidemiology of rotavirus and norovirus infections in Libyan children. *J Med Virol* 2011;**83**:1849–56.
27. Ochoa TJ, Salazar-Lindo E, Cleary TG. Management of children with infection-associated persistent diarrhea. *Semin Pediatr Infect Dis* 2004;**15**:229–36.
28. Uysal G, Sökmen A, Vidinlisan S. Clinical risk factors for fatal diarrhea in hospitalized children. *Indian J Pediatr* 2000;**67**:329–33.
29. Armah GE, Steele AD, Esona MD, *et al.* Diversity of rotavirus strains circulating in West Africa from 1996 to 2000. *J Infect Dis* 2010;**202**(S1):S64–71.

EPI-RV-Ivory Coast  
Journal resubmission BMJ Open

- 1  
2  
3  
4 30. Todd S, Page NA, Steele DA, *et al.* Rotavirus strain types circulating in Africa:  
5  
6 Review of Studies Published during 1997–2006. *J Infect Dis* 2010;**202**:S34–42.  
7  
8  
9  
10 31. World Health Organization. Rotavirus surveillance in the African Region.  
11 Updates of Rotavirus surveillance in the African Region.  
12 [http://www.afro.who.int/index.php?option=com\\_content&view=article&id=2486:rotavirus-surveillance-in-the-african-region&catid=1980&Itemid=2737](http://www.afro.who.int/index.php?option=com_content&view=article&id=2486:rotavirus-surveillance-in-the-african-region&catid=1980&Itemid=2737) (accessed  
13 26 July 2013).  
14  
15  
16  
17  
18  
19  
20  
21  
22 31-32. Dennehy PH. Transmission of rotavirus and other enteric pathogens in the  
23 home. *Pediatr Infect Dis J* 2000;**19**:S103–5.  
24  
25  
26  
27 32-33. Parashar UD, Gibson CJ, Bresse JS, *et al.* Rotavirus and severe childhood  
28 diarrhea. *Emerg Infect Dis* 2006;**12**:304–6.  
29  
30  
31  
32 33-34. Paulke-Korienk M, Rendi-Wagner P, Kundi M, *et al.* Universal mass  
33 vaccination against rotavirus gastroenteritis: impact on hospitalization rates in  
34 Austrian children. *Pediatr Infect Dis J* 2010;**29**:319–23.  
35  
36  
37  
38 34-35. Richardson V, Hernandez-Pichardo J, Quintanar-Solares M, *et al.* Reduction  
39 in childhood diarrhea deaths after rotavirus vaccine introduction in Mexico. *N*  
40 *Engl J Med* 2010;**362**:299–305.  
41  
42  
43  
44  
45  
46  
47 35-36. Yen C, Tate JE, Patel MM, *et al.* Rotavirus vaccines: update on global  
48 impact and future priorities. *Hum Vaccin* 2011;**7**:1282–90.  
49  
50  
51  
52 36-37. Centers for Disease Control. Rotavirus surveillance—worldwide, 2001–  
53 2008. *MMWR Morb Mortal Wkly Rep* 2008;**57**:1255–7.  
54  
55  
56  
57  
58  
59  
60

EPI-RV-Ivory Coast  
Journal resubmission BMJ Open

1  
2  
3  
4  
5  
6  
7  
8  
9  
10  
11  
12  
13  
14  
15  
16  
17  
18  
19  
20  
21  
22  
23  
24  
25  
26  
27  
28  
29  
30  
31  
32  
33  
34  
35  
36  
37  
38  
39  
40  
41  
42  
43  
44  
45  
46  
47  
48  
49  
50  
51  
52  
53  
54  
55  
56  
57  
58  
59  
60

37-38. Ruiz-Palacios GM, Pérez-Schael I, Velázquez FR, *et al.* Safety and efficacy of an attenuated vaccine against severe rotavirus gastroenteritis. *New Engl J Med* 2006;**354**:11–22.

38-39. Linhares AC, Velázquez FR, Pérez-Schael I, *et al.* Efficacy and safety of an oral live attenuated human rotavirus vaccine against rotavirus gastroenteritis during the first 2 years of life in Latin American infants: randomized, double-blind controlled study. *Lancet* 2008;**371**:1181–99.

39-40. Madhi SA, Cunliffe NA, Steele D, *et al.* Effect of human rotavirus vaccine on severe diarrhea in African infants. *N Engl J Med* 2010;**362**:289–98.

40-41. Armah GE, Sow SO, Breiman RF, *et al.* Efficacy of pentavalent rotavirus vaccine against severe rotavirus gastroenteritis in infants in developing countries in sub-Saharan Africa: a randomized, double-blind, placebo-controlled trial. *Lancet* 2010;**376**:606–14.

41-42. Meeting of the Strategic Advisory Group of Experts on immunization, October 2009 – conclusions and recommendations. *Wkly Epidemiol Rec* 2009;**84**:517–32.

42-43. World Health Organization. Generic protocols for (i) hospital-based surveillance to estimate the burden of rotavirus gastroenteritis in children and (ii) a community-based survey on utilization of health care services for gastroenteritis in children. *Vaccine Assessment and Monitoring team of the Department of Vaccines and Biologicals*. 2002, Vol. WHO/V&B/02.15.



**Figure 1: Distribution of GE cases by RV status by age groups (N = 332)**

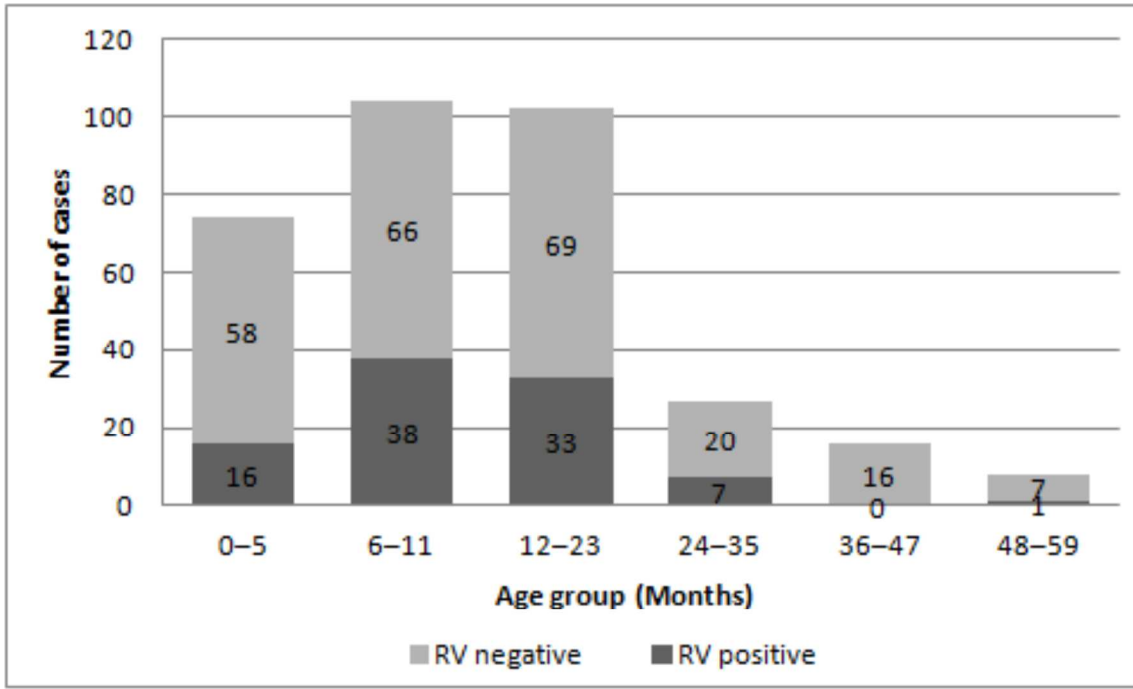

Note: RV status of one subject in the age group 0-5 Months was unknown

CONFIDENTIAL  
Peer review only

EPI-RV-Ivory Coast  
Journal resubmission BMJ Open

**Figure 2: Seasonality of acute GE and RVGE hospitalizations (N=331)**

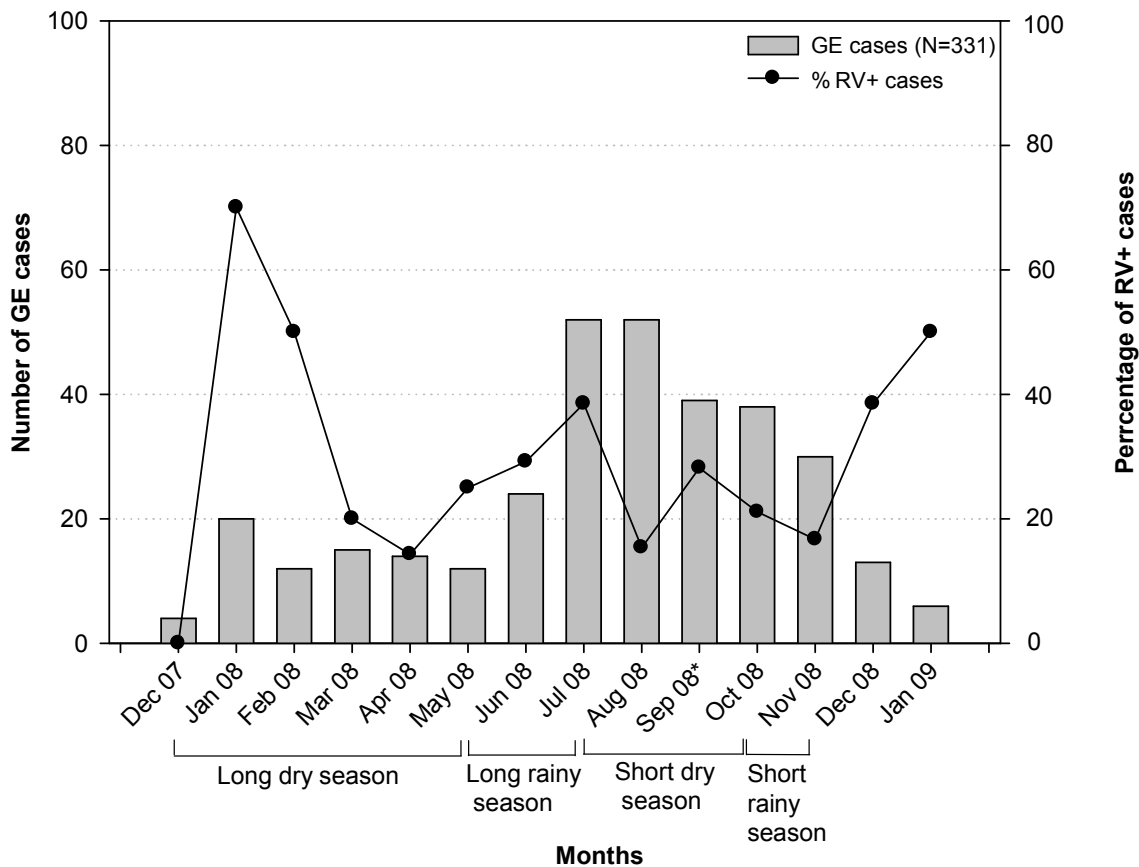

COMING ONLY

Figure 23: Distribution of RV G and P types (N=331)

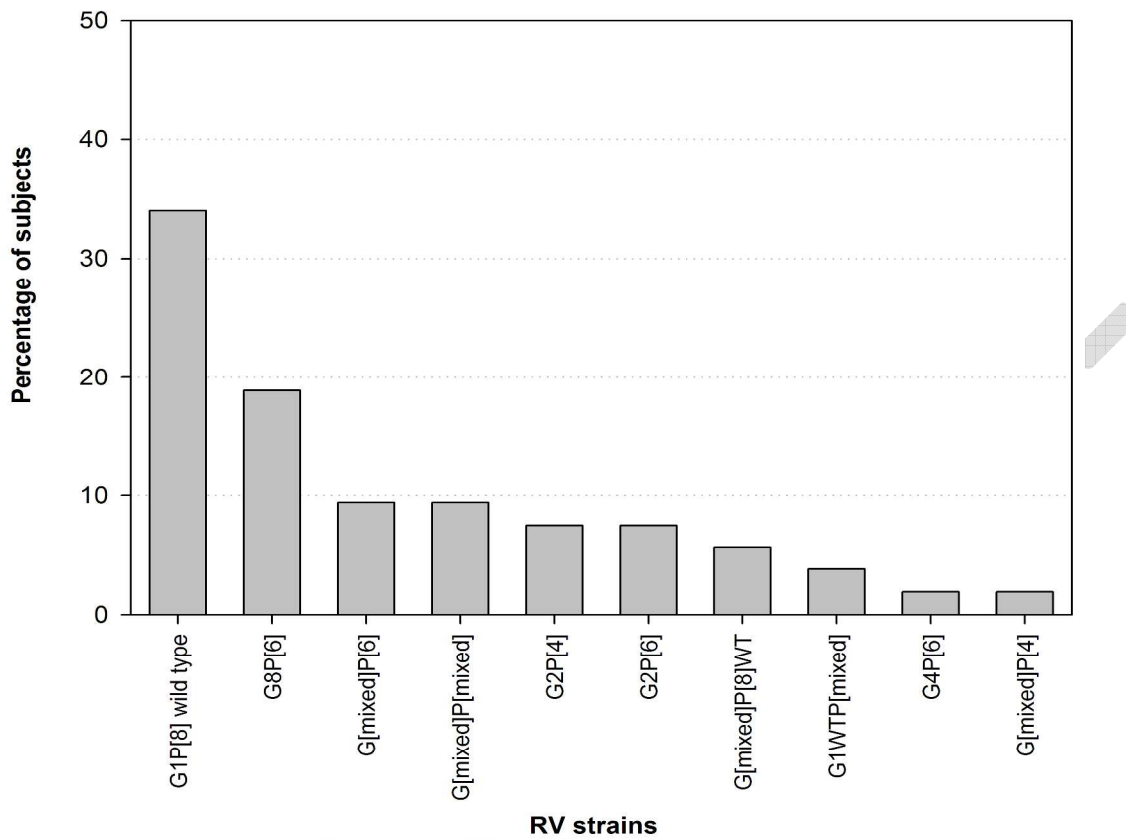

CONFIDENTIAL - Review only

1  
2  
3  
4  
5  
6  
7  
8  
9  
10  
11  
12  
13  
14  
15  
16  
17  
18  
19  
20  
21  
22  
23  
24  
25  
26  
27  
28  
29  
30  
31  
32  
33  
34  
35  
36  
37  
38  
39  
40  
41  
42  
43  
44  
45  
46  
47  
48  
49  
50  
51  
52  
53  
54  
55  
56  
57  
58  
59  
60
